# Supplementary material for: COVID-19 vaccination coverage for half a million non-EU migrants and refugees in England
Source: Springer Nature journal article supplement (doi:10.1038/s41562-023-01768-6), 2023-12-04
Supplement: MOESM1 [file 41562_2023_1768_MOESM1_ESM.pdf]

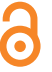

---

# COVID-19 vaccination coverage for half a million non-EU migrants and refugees in England

---

In the format provided by the authors and unedited

---

## **Supplementary Appendix:** COVID-19 vaccination coverage for half a million non-EU migrants and refugees in England

### **Contents**

Appendix A. Further details on the UK COVID-19 vaccination programme

Appendix B. UK tuberculosis pre-entry screening programme and refugee resettlement schemes

    UK Tuberculosis Pre-entry Screening Programme

    UK Refugee Resettlement Schemes

Appendix C. Linkage Methodology

    Step 1: Linking the Million Migrant cohort to NHS PDS

    Step 2. Linking the Million Migrant cohort to NIMS COVID-19 Vaccination records

Appendix D. Defining data sources, study outcomes, and variables

    Description of data sources

    Defining study outcomes

    Variables

Appendix E. Theoretical diagrams and confounder selection

    Explaining confounder selection and models

Appendix F. Sensitivity analyses

    Sensitivity analysis 1: estimating impact of emigration and embarkations on overdue second doses

Appendix G. Results - Data flow diagram and linkage

Appendix H. Results - Delayed vaccination

Appendix I. Results - Overdue vaccination

References

## Appendix A. Further details on the UK COVID-19 vaccination programme

The UK COVID-19 vaccination programme started on the 8<sup>th</sup> of December 2020 and was divided into three phases (Supplementary Table 1). The vaccine was first offered to pre-defined priority groups and then rolled out to the entire adult population.<sup>1</sup>

**Supplementary Table 1.** UK COVID-19 vaccination programme by phase, timeline, and priority groups.

| Phase | Timeline                              | Priority group                                                                                                                                                                                                                                                                                                                                                                                                                                                                                                                                                                                                                                                                    |
|-------|---------------------------------------|-----------------------------------------------------------------------------------------------------------------------------------------------------------------------------------------------------------------------------------------------------------------------------------------------------------------------------------------------------------------------------------------------------------------------------------------------------------------------------------------------------------------------------------------------------------------------------------------------------------------------------------------------------------------------------------|
| 1     | Started 08/12/2020                    | <ol style="list-style-type: none"> <li>1. Residents in care homes for older adults and cares</li> <li>2. Individuals 80 years of age and over</li> <li>    Front-line health and social care workers</li> <li>3. Individuals 75 years of age and older</li> <li>4. Individuals 70 years of age and older</li> <li>    Clinically extremely vulnerable individuals</li> <li>5. Individuals 65 years of age and older</li> <li>6. Individuals aged 16-64 with underlying health conditions</li> <li>    Unpaid carers</li> <li>7. Individuals 60 years of age and over</li> <li>8. Individuals 55 years of age and over</li> <li>9. Individuals 50 years of age and over</li> </ol> |
| 2     | Started 04/2021                       | <ol style="list-style-type: none"> <li>10. Individuals between 40-49 years</li> <li>11. Individuals between 30-39 years</li> <li>12. Individuals between 18-29 years</li> </ol>                                                                                                                                                                                                                                                                                                                                                                                                                                                                                                   |
| 3     | Started 09/2021<br>08/2021<br>09/2021 | Boosters<br>Individuals between 16-17 years-old<br>Individuals between 12-15 years old                                                                                                                                                                                                                                                                                                                                                                                                                                                                                                                                                                                            |

### COVID-19 vaccine mandates

COVID-19 vaccination mandates were in place for health and social care staff in England from November 2021 through 15 March 2022.<sup>2</sup> The UK government amended the Health and Social Care Act 2008 to mandate COVID-19 vaccination for healthcare workers unless exempt. This mandate was revoked by the government on 15 March 2022.

### Integrating COVID-19 vaccinations received abroad into UK COVID-19 NIMS dataset

In the first instance, people living in England who received their vaccine from a different devolved administration (e.g. Welsh or Scottish borders) were added into NIMS. Secondly, from September 2021, UK recognised the following vaccines Covidshield, Bharat Biotect, SinoPharm, SinoVac given in other countries and were recorded in NIMS. Our cohort includes only individuals on student visa who arrived prior to 2020.

## Appendix B. UK tuberculosis pre-entry screening programme and refugee resettlement schemes

### UK Tuberculosis Pre-entry Screening Programme

All individual's resident in a non-European Country where tuberculosis is common (40 cases per 100,000 people) and planning to come and live in the UK for more than 6 months are screened for tuberculosis as part of the UK visa application process.<sup>3</sup> The UK tuberculosis pre-entry screening programme was first piloted in 15 countries from 2005 and then subsequently rolled out to 101 countries through four phases between May 2012 and March 2014. The non-EU migrant pre-entry tuberculosis dataset included individuals screened between 1 January 2005 and 31 December 2020.

**Supplementary Table 2.** List of countries in the UK tuberculosis pre-entry screening programme and rollout date.

| Country                     | Pre-entry screening rollout phase |
|-----------------------------|-----------------------------------|
| Cambodia                    | Pre-entry pilot scheme            |
| United Republic of Tanzania | Pre-entry pilot scheme            |
| Bangladesh                  | Pre-entry pilot scheme            |
| Kenya                       | Pre-entry pilot scheme            |
| Eritrea                     | Pre-entry pilot scheme            |
| Pakistan                    | Pre-entry pilot scheme            |
| Sudan                       | Pre-entry pilot scheme            |
| Ivory Coast                 | Pre-entry pilot scheme            |
| Niger                       | Pre-entry pilot scheme            |
| Laos                        | Pre-entry pilot scheme            |
| Thailand                    | Pre-entry pilot scheme            |
| Burkina Faso                | Pre-entry pilot scheme            |
| Ghana                       | Pre-entry pilot scheme            |
| Somalia                     | Pre-entry pilot scheme            |
| Togo                        | Pre-entry pilot scheme            |
| Malaysia                    | Phase 1 - completed 31/12/12      |
| India                       | Phase 1 - completed 31/12/12      |
| South Africa                | Phase 1 - completed 31/12/12      |
| Philippines                 | Phase 1 - completed 31/12/12      |
| Mali                        | Phase 1 - completed 31/12/12      |
| Lesotho                     | Phase 1 - completed 31/12/12      |
| Uganda                      | Phase 2 - completed 31/10/13      |
| Morocco                     | Phase 2 - completed 31/10/13      |
| Indonesia                   | Phase 2 - completed 31/10/13      |
| Zambia                      | Phase 2 - completed 31/10/13      |
| Zimbabwe                    | Phase 2 - completed 31/10/13      |
| Malawi                      | Phase 2 - completed 31/10/13      |
| Vietnam                     | Phase 2 - completed 31/10/13      |
| Sierra Leone                | Phase 2 - completed 31/10/13      |
| Gambia                      | Phase 2 - completed 31/10/13      |
| Ethiopia                    | Phase 2 - completed 31/10/13      |
| Russia                      | Phase 3 - completed 31/12/13      |
| Senegal                     | Phase 3 - completed 31/12/13      |
| Mauritania                  | Phase 3 - completed 31/12/13      |
| Mongolia                    | Phase 3 - completed 31/12/13      |
| Mozambique                  | Phase 3 - completed 31/12/13      |
| East Timor                  | Phase 3 - completed 31/12/13      |
| Central African Republic    | Phase 3 - completed 31/12/13      |
| Tajikistan                  | Phase 3 - completed 31/12/13      |
| Republic of Congo           | Phase 3 - completed 31/12/13      |
| Moldova                     | Phase 3 - completed 31/12/13      |
| Namibia                     | Phase 3 - completed 31/12/13      |
| Botswana                    | Phase 3 - completed 31/12/13      |

| <b>Country</b>                   | <b>Pre-entry screening rollout phase</b> |
|----------------------------------|------------------------------------------|
| Solomon Islands                  | Phase 3 - completed 31/12/13             |
| Ukraine                          | Phase 3 - completed 31/12/13             |
| Angola                           | Phase 3 - completed 31/12/13             |
| Uzbekistan                       | Phase 3 - completed 31/12/13             |
| South Korea                      | Phase 3 - completed 31/12/13             |
| Burundi                          | Phase 3 - completed 31/12/13             |
| Liberia                          | Phase 3 - completed 31/12/13             |
| Papua New Guinea                 | Phase 3 - completed 31/12/13             |
| Nepal                            | Phase 3 - completed 31/12/13             |
| Haiti                            | Phase 3 - completed 31/12/13             |
| Peru                             | Phase 3 - completed 31/12/13             |
| Nigeria                          | Phase 3 - completed 31/12/13             |
| Myanmar                          | Phase 3 - completed 31/12/13             |
| North Korea                      | Phase 3 - completed 31/12/13             |
| Afghanistan                      | Phase 3 - completed 31/12/13             |
| Suriname                         | Phase 3 - completed 31/12/13             |
| Democratic Republic of the Congo | Phase 3 - completed 31/12/13             |
| Ecuador                          | Phase 3 - completed 31/12/13             |
| Equatorial Guinea                | Phase 3 - completed 31/12/13             |
| Kazakhstan                       | Phase 3 - completed 31/12/13             |
| Gabon                            | Phase 3 - completed 31/12/13             |
| Bhutan                           | Phase 3 - completed 31/12/13             |
| Madagascar                       | Phase 3 - completed 31/12/13             |
| Guinea Bissau                    | Phase 3 - completed 31/12/13             |
| Chad                             | Phase 3 - completed 31/12/13             |
| Cameroon                         | Phase 3 - completed 31/12/13             |
| China                            | Phase 3 - completed 31/12/13             |
| Guinea                           | Phase 3 - completed 31/12/13             |
| Rwanda                           | Phase 3 - completed 31/12/13             |
| Djibouti                         | Phase 3 - completed 31/12/13             |
| Guyana                           | Phase 3 - completed 31/12/13             |
| Kyrgyzstan                       | Phase 3 - completed 31/12/13             |
| Swaziland                        | Phase 3 - completed 31/12/13             |
| Bolivia                          | Phase 3 - completed 31/12/13             |
| Iraq                             | Phase 4 - completed 31/03/14             |
| Guatemala                        | Phase 4 - completed 31/03/14             |
| Benin                            | Phase 4 - completed 31/03/14             |
| Dominican Republic               | Phase 4 - completed 31/03/14             |
| Georgia                          | Phase 4 - completed 31/03/14             |
| Azerbaijan                       | Phase 4 - completed 31/03/14             |
| Brunei                           | Phase 4 - completed 31/03/14             |
| Belarus                          | Phase 4 - completed 31/03/14             |
| South Sudan                      | Phase 4 - completed 31/03/14             |
| Sri Lanka                        | Phase 4 - completed 31/03/14             |
| Panama                           | Phase 4 - completed 31/03/14             |
| Vanuatu                          | Phase 4 - completed 31/03/14             |
| Paraguay                         | Phase 4 - completed 31/03/14             |
| Armenia                          | Phase 4 - completed 31/03/14             |
| Turkmenistan                     | Phase 4 - completed 31/03/14             |
| Algeria                          | Phase 4 - completed 31/03/14             |

### **UK Refugee Resettlement Schemes**

The UK government accepts refugees identified by the United Nations High Commissioner for Refugees (UNHCR) under a series of resettlement schemes. These schemes include: the Gateway Protection Programme, the Mandate Resettlement Scheme, the Syrian Vulnerable Persons Resettlement Scheme, and the Vulnerable Children Resettlement Scheme.<sup>4</sup> These individuals receive a pre-entry health assessment prior to arrival in the UK

that aims to identify health and social care needs to be addressed and accommodated for once in the UK.<sup>5</sup> The refugee pre-arrival dataset used includes individuals who were given a health assessment between 1 March 2013 and 31 December 2022. The cohort does not include individuals on Afghan Citizens Resettlement Scheme (ACRS), Afghan Relocations and Assistance Policy (ARAP) or Ukrainian resettlement schemes.

## Appendix C. Linkage Methodology

### Step 1: Linking the Million Migrant cohort to NHS PDS

The Million Migrant cohort records were deterministically linked to the NHS PDS (via the PDS tracing service) to obtain NHS numbers and UK postcodes. Only exact matches between all linkage variables were retrieved. Adjustments to the linkage variables were made in order to account for differences in name structure or errors in recorded date of birth (Supplementary Table 3).

**Supplementary Table 3.** Modifications to linkage variables by round in exact deterministic linkage of Million Migrant cohort to NHS PDS.

| Round | Variable      | Modification                                                                                                       |
|-------|---------------|--------------------------------------------------------------------------------------------------------------------|
| 1     | Forename      | Accented characters transformed into base unaccented version; hyphens and apostrophes replaced with a wildcard (*) |
|       | Surname       | Accented characters transformed into base unaccented version; hyphens and apostrophes replaced with a wildcard (*) |
| 2     | Forename      | Placed a wildcard (*) after the first forename (e.g. Anna* if Anna Marie).                                         |
|       | Surname       | If more than one surname, placed a wildcard (*) in front of the last surname (e.g. *Smith if Roberts Smith).       |
| 3     | Forename      | Placed a wildcard (*) after all forenames (e.g. Anna* if Anna Marie or Anna).                                      |
| 4     | Date of birth | Exchanged month and day.                                                                                           |

### Step 2. Linking the Million Migrant cohort to NIMS COVID-19 Vaccination records

The Million Migrant cohort was linked to NIMS COVID-19 vaccination records using a stepwise deterministic matching procedure developed by NHS Digital (Supplementary Table 4). Match rank corresponds to the step at which the match will be determined and demonstrates the quality of the matching. For example, a lower match rank value indicates a match based on a greater number of restrictions and is considered to be stronger evidence of a true positive match.

**Supplementary Table 4.** Stepwise deterministic matching algorithm according to detail of identifying variables for linkage of Million Migrant cohort to NIMS data.

| Match rank | NHS Number | Date of birth | Sex   | Postcode |
|------------|------------|---------------|-------|----------|
| 1          | Exact      | Exact         | Exact | Exact    |
| 2          | Exact      | Exact         | Exact |          |
| 3          | Exact      | Partial       | Exact | Exact    |
| 4          | Exact      | Partial       | Exact |          |
| 5          | Exact      |               |       | Exact    |
| 6*         |            | Exact         | Exact | Exact    |
| 7**        |            | Exact         | Exact | Exact    |
| 8***       |            | Exact         | Exact | Exact    |

\* Where NHS number does not contradict the match and DOB is not 1 January and the postcode is in the 'ignore' list such as postcodes for communal establishments such as hospitals, care homes, prisons, and boarding schools.

\*\* Where NHS number does not contradict the match and DOB is not 1 January.

\*\*\* Where DOB is not 1 January.

## Appendix D. Defining data sources, study outcomes, and variables

### Description of data sources

**Supplementary Table 5.** Data sources and variables used in the study

| Dataset                                                        | Collected by                 | Dataset details                                                                                                                                                                                                                                                                                       | Variables                                                                                   |
|----------------------------------------------------------------|------------------------------|-------------------------------------------------------------------------------------------------------------------------------------------------------------------------------------------------------------------------------------------------------------------------------------------------------|---------------------------------------------------------------------------------------------|
| <b>Non-EU migrant pre-entry tuberculosis screening dataset</b> | IOM, held by UKHSA           | Derived from records on non-EU migrants' pre-entry tuberculosis screening collected between 1 January 2005 and 31 December 2020. Part of the Million Migrant cohort.                                                                                                                                  | Age, sex, region of origin, visa type, and year of screening                                |
| <b>Refugee pre-arrival health assessment dataset</b>           | IOM, held by UKHSA           | Derived from records on refugees' pre-arrival health assessment collected between 1 January 2013 and 31 December 2020. Part of the Million Migrant cohort.                                                                                                                                            | Age, sex, region of origin, visa type, and year of health assessment                        |
| <b>NHS Personal Demographic Service</b>                        | NHS                          | National database of patient demographic information in England used to identify the NHS numbers and postcode in the Million Migrant cohort.                                                                                                                                                          | NHS number, UK postcode                                                                     |
| <b>NIMS COVID-19 vaccination dataset</b>                       | UKHSA                        | Records on NHS COVID-19 vaccination programme in England.                                                                                                                                                                                                                                             | COVID-19 vaccine dose, COVID-19 vaccine dose date, ethnicity                                |
| <b>OpenSAFELY</b>                                              | The OpenSAFELY Collaborative | Participants included all patients (N = 19,188,764; migrants and non-migrants) with a recorded date of birth and sex from 40% of general practices that use TPP SystemOne software in England. Publicly available data with COVID-19 vaccine dose aggregated for each day by age group and ethnicity. | COVID-19 vaccine dose (aggregated by day), ethnicity (available only $\geq 18$ ), age group |

### Defining study outcomes

#### *Delayed vaccination*

Vaccination delay was a binary variable used to investigate differences in the timing of uptake of second and third vaccination by age and visa type. Individuals aged 18 and older who had completed at least 14 weeks of follow up after their last recorded COVID-19 vaccine dose by the end of the study period (20 April 2022) were included in this outcome. Second and third doses given less than 19 days after the first or second dose, were excluded from the denominator population to follow the same perimeters as the OpenSAFELY cohort (270 second doses and 112 third doses excluded within the Million Migrant-NIMS cohort).<sup>6</sup>

Second doses were considered delayed if they were not received within 14 weeks after the first dose. This was in line with the recommendation for most adults to receive their second dose within 12 weeks of their first dose with an additional two weeks to account for appointment bookings.<sup>7</sup> Please note that the intervals between the first and second doses changed over time in England. Although a minority of participants in our cohort were eligible for their second dose before the 12-week interval, we decided to use the 12-week interval as the cut off for a delayed vaccine after which all participants were always able to receive a second dose.

Based on the UK booster vaccine rollout schedule, a booster programme was rolled out in September 2022 which for most of the population will be a third dose. Please note that when referring to a third dose in this study, this relates to the initial booster programme and not a third primary dose for those who are severely



immunocompromised. A third dose was considered delayed if it was not received within 30 days following each age group's eligible date. Dates were: 29 September 2021 for adults over 50 years at least six months post second dose, 7 December 2021 for adults over 40 years at least three months post second dose, and 28 December 2021 for adults under 40 years with at least three months post second dose.<sup>8-10</sup> If an individual did not have the minimum required months post second dose at the time of their age group's eligible date, their third dose was assessed within 30 days after they fulfilled the required time period. To account for change in the booster eligibility criteria from 6 to 3 months on 13 December 2021, adults over the age of 18 who received a second dose from 13 September 2021 were considered eligible to receive a booster from 3 months post second dose.<sup>11</sup>

## **Variables**

### *Million Migrant cohort*

Sex, region of origin, arrival visa type, and year of arrival to England were available from the pre-entry TB screening and refugee pre-arrival health assessment datasets. Region of origin was determined by country of origin and categorised into the following World Bank geographical areas: East Asia and Pacific, Europe and Central Asia, Latin America and Caribbean, Middle East and North Africa, North America, South Asia, Sub-Saharan Africa and Missing. Arrival visa type was composed of the following categories: Students, Work, Settlement and Dependents, Family Reunion, Refugee, Other, and Missing. The Other category includes a range of individuals on UK visa agreements to specific migration situations. Year of arrival to England was assumed to be equivalent to the year of migrant pre-entry TB screening or refugee pre-arrival health assessment record. Region resident in England was derived from the Million Migrant cohort following linkage to PDS for attainment of NHS numbers. Region of residence in England was determined from the UK postcode. Ethnicity was derived from the Million Migrant-PDS cohort following linkage to the COVID-19 NIMS dataset. Ethnicity categories were based on the 2011 Census' 18 categories grouped into 6 broader categories. These 6 broader categories include Asian, Black, Mixed, White, Other and Unknown. The Other category included individuals with Arab, any other ethnic group, Chinese (other), and any other Asian background. The Unknown category was anyone with a missing ethnicity category. Age groups were calculated from the individuals' age at first dose and were the following categories: 16-17, 18-29, 30-39, 40-49, 50-54, 55-59, 60-64, 65-69, 70-79, 80+.

### *England cohort*

The OpenSAFELY cohort was publicly available aggregated data. Daily vaccination count data was aggregated by age group and ethnicity. Age groups were the same categories as the Million Migrant cohort. Ethnicity was extracted from primary care records and used the same categories as the Million Migrant cohort listed above.

**Appendix E. Theoretical diagrams and confounder selection**

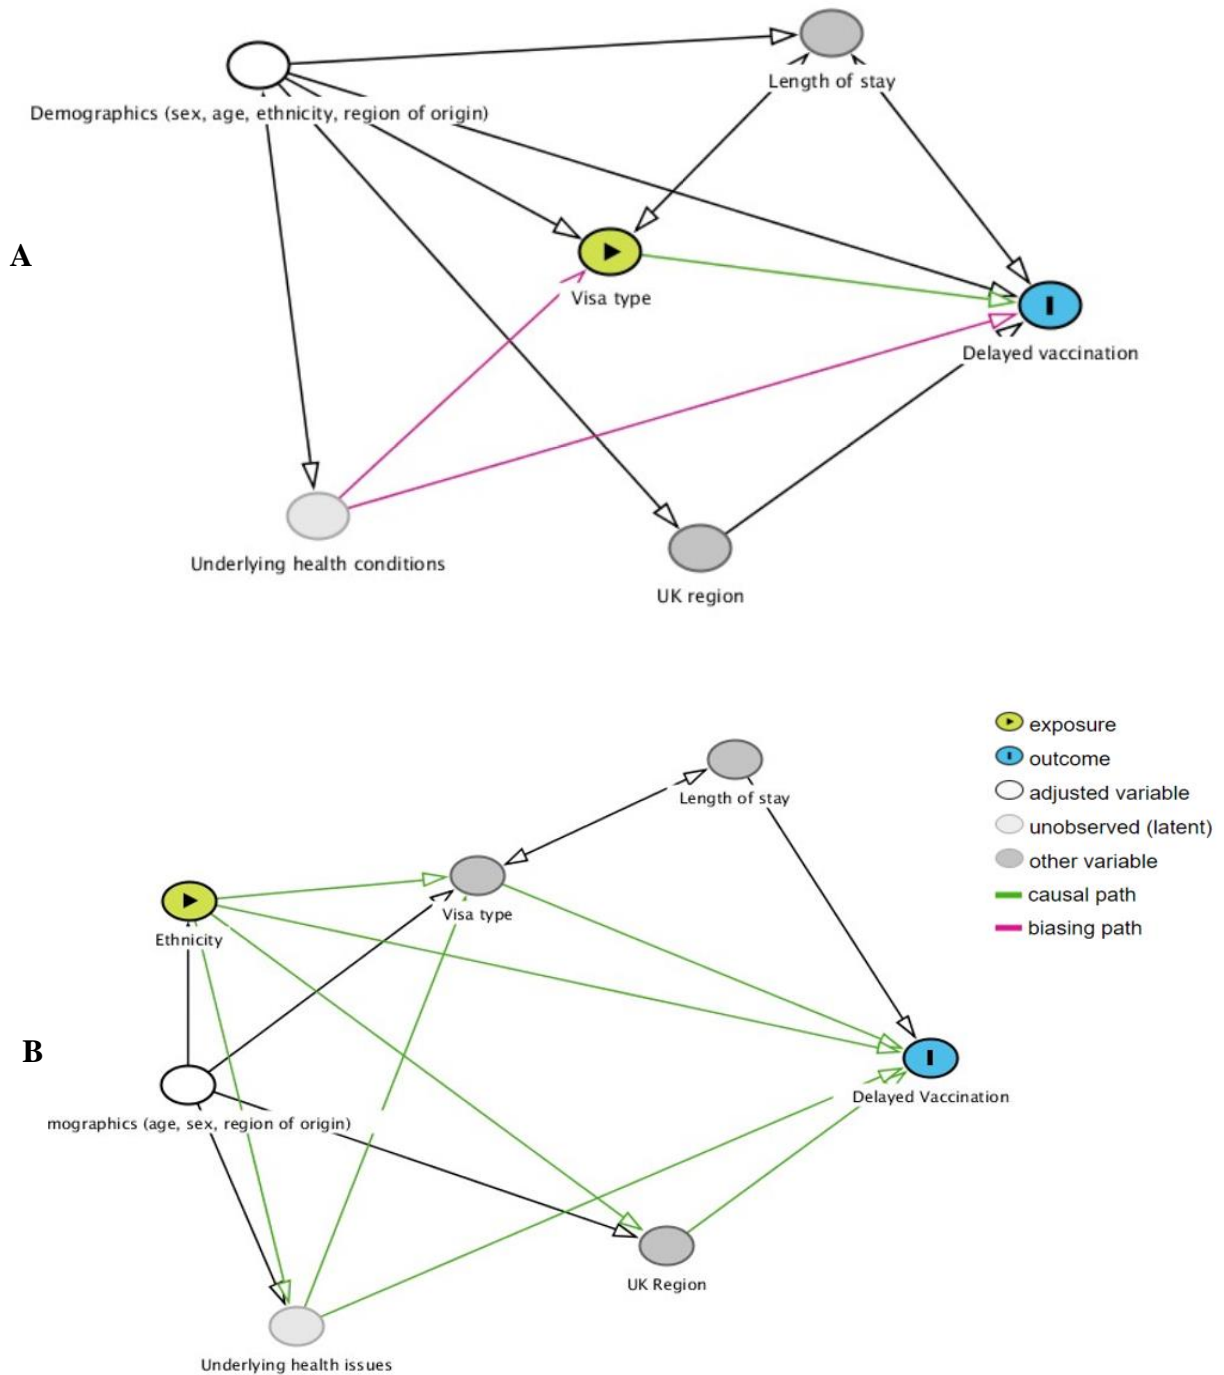

**Supplementary Figure 1.** Directed acyclic graph of the relationship between visa type and delayed vaccination (A) and ethnicity and delayed vaccination (B).

### **Explaining confounder selection and models**

The multivariable logistic regression models were performed to describe the association between each delayed vaccination dose and exposure (either visa type or ethnicity). Although these analyses were not performed to describe a causal relationship between the exposure and outcome, we drew a directed acyclic graph (DAG) of variables that are related to both to help guide the selection of confounders (Supplementary Figure 1).

We conducted model checks for multicollinearity between region of origin, ethnicity, and visa type by calculating the generalised variance inflation factor (GVIF) using the `vif` command in the `car` package. Evidence of multicollinearity was assumed if the adjusted GVIF exceeded 10.

With visa type as the main exposure, we adjusted the final model by age, sex, and ethnicity. Region of origin was not included as it showed high multicollinearity with ethnicity. With ethnicity as the main exposure, we adjusted the final model by age and sex, as visa type is likely to be on the causal pathway between the exposure and outcome.

For second dose delayed, only individuals aged 18 years and older who had received their second dose within the study period were included. For third dose delayed, only individuals aged 18 years and older who had received their third dose within the study period were included.

## **Appendix F. Sensitivity analyses**

### **Sensitivity analysis 1: estimating impact of emigration and embarkations on overdue second doses**

As our dataset does not contain information on emigration or embarkations out of England, our estimates for overdue vaccinations could have been biased by overestimating the denominator and therefore the total proportion of people not receiving their second or third dose during the study follow up period. Given that some populations are likely to be more mobile, the impact of this bias is unlikely to be uniform across migrant sub-groups. It is important that we carried out some sensitivity analyses assuming different scenarios to estimate how this bias may affect the results of the study.

First, we restricted the study follow up period to end on 1 June 2021 instead of 20 April 2022, with an aim to estimate the impact of movement out of England once international travel had resumed on the proportion of overdue second vaccinations. Individuals who had received their last recorded dose at least 14 weeks before 1 June 2021 were included in this sensitivity analysis.

Second, we removed all individuals on shorter term visas (student, work, working holiday) who migrated to the UK within the last 5 years (after 2017) from the Million Migrant-NIMS cohort (45143/467904, 9.6%). This group is the most likely to have emigrated during the study period given their shorter term visas and total length of time they had been living in England. This was done to examine a scenario in which the proportion of the cohort mostly likely to emigrate had returned to their region of origin during the study follow up period. We examined the impact of the remaining proportion of the cohort on the proportions of overdue second vaccinations.

**Appendix G. Results - Data flow diagram and linkage**

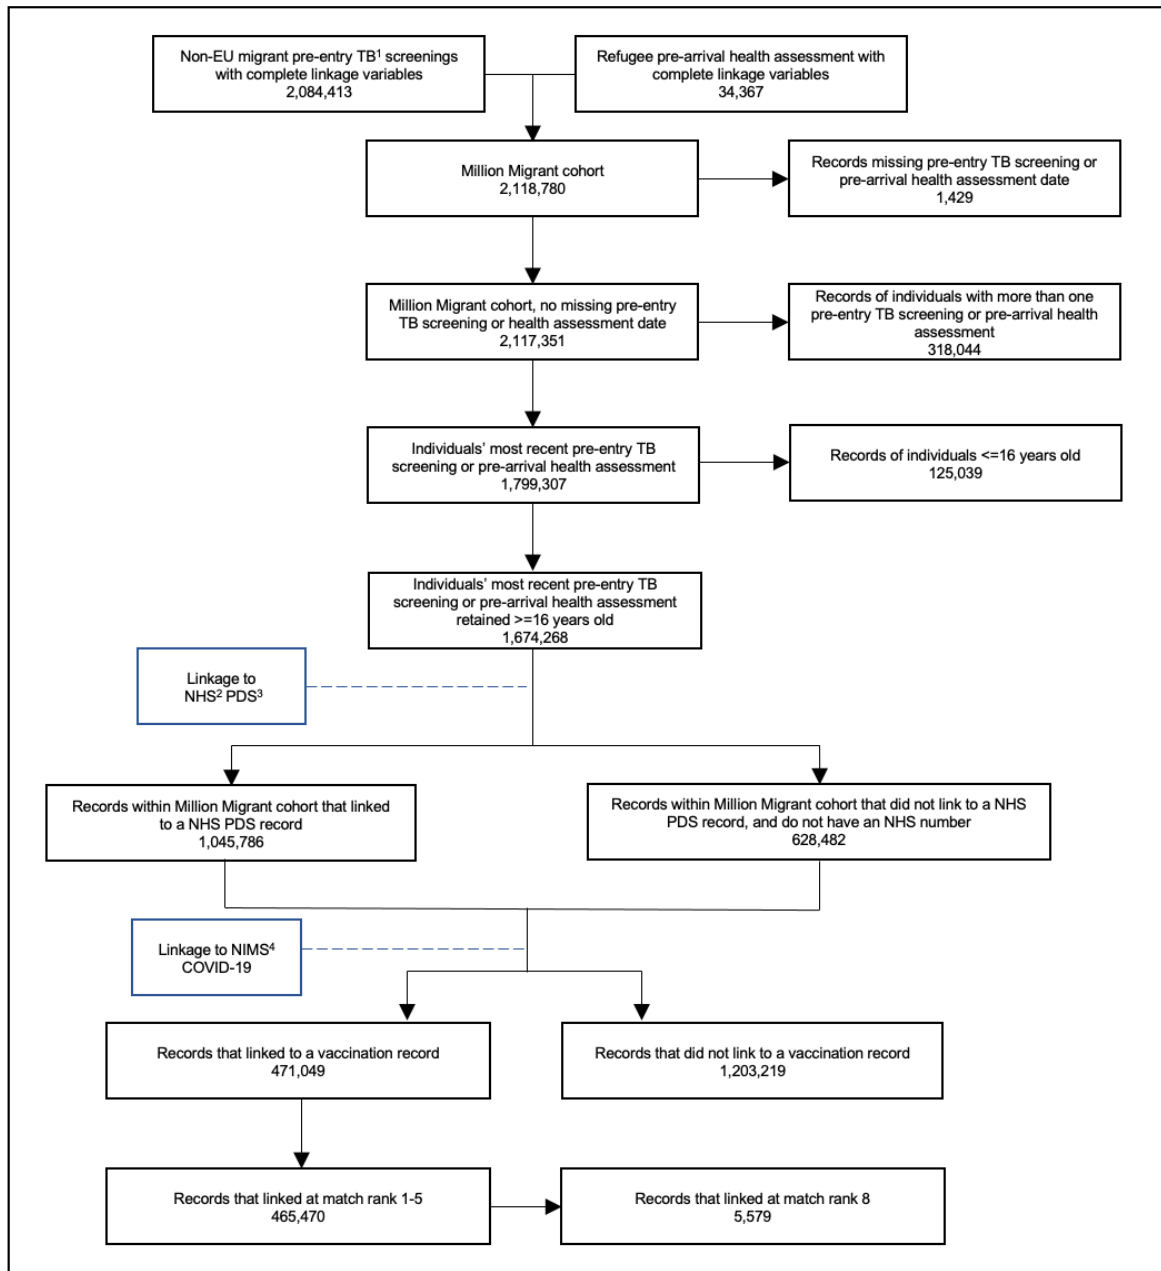

**Supplementary Figure 2.** Data flow diagram; TB = Tuberculous; NHS = National Health Service; PDS = Personal Demographic Service; NIMS = National Immunisation Management Service

**Supplementary Table 6.** Characteristics of individuals in the Million Migrant cohort >=16 years old who matched or did not match in NIMS by match rank.

| Characteristic             | Did not match<br>N = 1,203,219<br>(73.1%) | Matched<br>N = 471,049<br>(26.9%) | Match Rank                  |                             |                          |                          |                          |                          |  |
|----------------------------|-------------------------------------------|-----------------------------------|-----------------------------|-----------------------------|--------------------------|--------------------------|--------------------------|--------------------------|--|
|                            |                                           |                                   | 1<br>N = 342,140<br>(72.6%) | 2<br>N = 114,568<br>(24.3%) | 3<br>N = 3,577<br>(0.8%) | 4<br>N = 2,405<br>(0.5%) | 5<br>N = 2,780<br>(0.6%) | 8<br>N = 5,579<br>(1.2%) |  |
| <b>Sex</b>                 |                                           |                                   |                             |                             |                          |                          |                          |                          |  |
| Female                     | 562,714 (68.1%)                           | 263,741 (31.9%)                   | 192,755 (73.1%)             | 63,064 (23.9%)              | 2,045 (0.8%)             | 1,458 (0.6%)             | 1,202 (0.5%)             | 3,217 (1.2%)             |  |
| Male                       | 640,505 (75.5%)                           | 207,308 (24.5%)                   | 149,385 (72.1%)             | 51,504 (24.8%)              | 1,532 (0.7%)             | 947 (0.5%)               | 1,578 (0.8%)             | 2,362 (1.1%)             |  |
| <b>Age</b>                 | 31 (26, 38)                               | 32 (26, 38)                       | 33 (28, 39)                 | 29 (24, 35)                 | 29 (23, 35)              | 24 (21, 30)              | 28 (22, 35)              | 24 (22, 30)              |  |
| <b>Age group</b>           |                                           |                                   |                             |                             |                          |                          |                          |                          |  |
| 16-17                      | 13,396 (66.1%)                            | 6,866 (33.9%)                     | 5,118 (74.5%)               | 1,469 (21.4%)               | 73 (1.1%)                | 26 (0.4%)                | 52 (0.8%)                | 128 (1.9%)               |  |
| 18-29                      | 498,237 (74.5%)                           | 170,601 (25.5%)                   | 105,631 (61.9%)             | 55,924 (32.8%)              | 1,757 (1.0%)             | 1,772 (1.0%)             | 1,526 (0.9%)             | 3,991 (2.3%)             |  |
| 30-39                      | 450,222 (69.1%)                           | 201,092 (30.9%)                   | 154,572 (76.9%)             | 42,938 (21.4%)              | 1,263 (0.6%)             | 491 (0.2%)               | 830 (0.4%)               | 998 (0.5%)               |  |
| 40-49                      | 162,328 (71.1%)                           | 66,105 (28.9%)                    | 54,599 (82.6%)              | 10,421 (15.8%)              | 374 (0.6%)               | 93 (0.1%)                | 272 (0.4%)               | 346 (0.5%)               |  |
| 50-54                      | 32,640 (74.9%)                            | 10,959 (25.1%)                    | 9,213 (84.1%)               | 1,582 (14.4%)               | 55 (0.5%)                | #                        | #                        | 57 (0.5%)                |  |
| 55-59                      | 21,913 (79.4%)                            | 5,689 (20.6%)                     | 4,815 (84.6%)               | 788 (13.9%)                 | 30 (0.5%)                | 11 (0.2%)                | 22 (0.4%)                | 23 (0.4%)                |  |
| 60-64                      | 10,530 (75.7%)                            | 3,380 (24.3%)                     | 2,831 (83.8%)               | 508 (15.0%)                 | 10 (0.3%)                | #                        | #                        | 14 (0.4%)                |  |
| 65-69                      | 4,941 (68.1%)                             | 2,315 (31.9%)                     | 1,942 (83.9%)               | 353 (15.2%)                 | #                        | #                        | #                        | 11 (0.5%)                |  |
| 70-79                      | 6,375 (66.4%)                             | 3,230 (33.6%)                     | 2,725 (84.4%)               | 471 (14.6%)                 | #                        | #                        | 16 (0.5%)                | #                        |  |
| 80+                        | 2,637 (76.5%)                             | 812 (23.5%)                       | 694 (85.5%)                 | 114 (14.0%)                 | #                        | #                        | #                        | #                        |  |
| <b>Region of origin*</b>   |                                           |                                   |                             |                             |                          |                          |                          |                          |  |
| East Asia & Pacific        | 279,917 (74.3%)                           | 96,908 (25.7%)                    | 57,135 (59.0%)              | 31,148 (32.1%)              | 2,313 (2.4%)             | 1,924 (2.0%)             | 1,063 (1.1%)             | 3,325 (3.4%)             |  |
| Europe & Central Asia      | 19,897 (60.9%)                            | 12,775 (39.1%)                    | 8,533 (66.8%)               | 3,929 (30.8%)               | #                        | #                        | 83 (0.6%)                | 216 (1.7%)               |  |
| Latin America & Caribbean  | 338 (59.4%)                               | 231 (40.6%)                       | 139 (60.2%)                 | 86 (37.2%)                  | #                        | #                        | #                        | #                        |  |
| Middle East & North Africa | 7,662 (40.3%)                             | 11,367 (59.7%)                    | 9,242 (81.3%)               | 2,000 (17.6%)               | 12 (0.1%)                | #                        | #                        | #                        |  |
| North America              | 95 (37.3%)                                | 160 (62.7%)                       | 96 (60.0%)                  | 61 (38.1%)                  | #                        | #                        | #                        | #                        |  |
| South Asia                 | 182,051 (42.3%)                           | 248,507 (57.7%)                   | 193,921 (78.0%)             | 50,591 (20.4%)              | 1,213 (0.5%)             | 454 (0.2%)               | 962 (0.4%)               | 1,366 (0.5%)             |  |
| Sub-Saharan Africa         | 84,773 (45.6%)                            | 101,089 (54.4%)                   | 73,065 (72.3%)              | 26,750 (26.5%)              | 27 (0.0%)                | 19 (0.0%)                | 627 (0.6%)               | 601 (0.6%)               |  |
| <b>Entry Visa Type</b>     |                                           |                                   |                             |                             |                          |                          |                          |                          |  |
| Students                   | 696,546 (85.8%)                           | 115,640 (14.2%)                   | 21,281 (77.0%)              | 5,800 (21.0%)               | 208 (0.8%)               | 53 (0.2%)                | 126 (0.5%)               | 157 (0.6%)               |  |
| Work                       | 123,218 (64.6%)                           | 67,378 (35.4%)                    | 25,661 (59.4%)              | 15,565 (36.0%)              | 155 (0.4%)               | 93 (0.2%)                | 407 (0.9%)               | 1,342 (3.1%)             |  |

| Characteristic                    | Did not match            | Matched                | Match Rank                  |                             |                          |                          |                          |                          |
|-----------------------------------|--------------------------|------------------------|-----------------------------|-----------------------------|--------------------------|--------------------------|--------------------------|--------------------------|
|                                   | N = 1,203,219<br>(73.1%) | N = 471,049<br>(26.9%) | 1<br>N = 342,140<br>(72.6%) | 2<br>N = 114,568<br>(24.3%) | 3<br>N = 3,577<br>(0.8%) | 4<br>N = 2,405<br>(0.5%) | 5<br>N = 2,780<br>(0.6%) | 8<br>N = 5,579<br>(1.2%) |
| Settlement & Dependents           | 191,414 (48.2%)          | 205,755 (51.8%)        | 7,214 (86.5%)               | 1,056 (12.7%)               | #                        | #                        | 33 (0.4%)                | 28 (0.3%)                |
| Family Reunion                    | 48,761 (63.8%)           | 27,625 (36.2%)         | 169,722 (82.5%)             | 33,675 (16.4%)              | 724 (0.4%)               | 222 (0.1%)               | 594 (0.3%)               | 818 (0.4%)               |
| Refugee                           | 12,500 (60.0%)           | 8,338 (40.0%)          | 70,899 (61.3%)              | 36,911 (31.9%)              | 1,768 (1.5%)             | 1,718 (1.5%)             | 1,330 (1.2%)             | 3,014 (2.6%)             |
| Other                             | 118,557 (73.3%)          | 43,223 (26.7%)         | 2,146 (69.4%)               | 864 (28.0%)                 | #                        | #                        | 23 (0.7%)                | 40 (1.3%)                |
| Unknown                           | 12,223 (79.8%)           | 3,090 (20.2%)          | 45,217 (67.1%)              | 20,697 (30.7%)              | 705 (1.0%)               | 312 (0.5%)               | 267 (0.4%)               | 180 (0.3%)               |
| <b>Length of time in UK (yrs)</b> | 3.7 (2.3, 6.1)           | 3.5 (1.5, 7.6)         | 21,281 (77.0%)              | 5,800 (21.0%)               | 208 (0.8%)               | 53 (0.2%)                | 126 (0.5%)               | 157 (0.6%)               |
| <b>Length of time</b>             |                          |                        |                             |                             |                          |                          |                          |                          |
| <2                                | 204,935 (58.1%)          | 147,726 (41.9%)        | 93,283 (63.1%)              | 51,432 (34.8%)              | 187 (0.1%)               | 137 (0.1%)               | 893 (0.6%)               | 1,794 (1.2%)             |
| 2 to 3                            | 253,445 (70.3%)          | 107,031 (29.7%)        | 72,167 (67.4%)              | 28,206 (26.4%)              | 2,432 (2.3%)             | 1,797 (1.7%)             | 676 (0.6%)               | 1,753 (1.6%)             |
| 4 to 5                            | 213,708 (76.0%)          | 67,315 (24.0%)         | 50,211 (74.6%)              | 14,546 (21.6%)              | 758 (1.1%)               | 420 (0.6%)               | 432 (0.6%)               | 948 (1.4%)               |
| 6 to 7                            | 170,039 (82.6%)          | 35,918 (17.4%)         | 29,241 (81.4%)              | 5,993 (16.7%)               | 38 (0.1%)                | 19 (0.1%)                | 219 (0.6%)               | 408 (1.1%)               |
| >8                                | 361,092 (76.2%)          | 113,059 (23.8%)        | 97,238 (86.0%)              | 14,391 (12.7%)              | 162 (0.1%)               | 32 (0.0%)                | 560 (0.5%)               | 676 (0.6%)               |
| <b>Region in England</b>          |                          |                        |                             |                             |                          |                          |                          |                          |
| East Midlands                     | 30,900 (54.7%)           | 25,575 (45.3%)         | 18,611 (72.8%)              | 6,212 (24.3%)               | 181 (0.7%)               | 143 (0.6%)               | 181 (0.7%)               | 247 (1.0%)               |
| East of England                   | 30,413 (42.5%)           | 41,120 (57.5%)         | 30,484 (74.1%)              | 9,414 (22.9%)               | 311 (0.8%)               | 152 (0.4%)               | 203 (0.5%)               | 556 (1.4%)               |
| London                            | 127,429 (46.8%)          | 144,909 (53.2%)        | 108,269 (74.7%)             | 32,554 (22.5%)              | 1,304 (0.9%)             | 642 (0.4%)               | 760 (0.5%)               | 1,380 (1.0%)             |
| North East                        | 18,872 (56.9%)           | 14,319 (43.1%)         | 10,444 (72.9%)              | 3,433 (24.0%)               | 116 (0.8%)               | 78 (0.5%)                | 75 (0.5%)                | 173 (1.2%)               |
| North West                        | 45,531 (47.9%)           | 49,435 (52.1%)         | 38,637 (78.2%)              | 9,287 (18.8%)               | 351 (0.7%)               | 236 (0.5%)               | 284 (0.6%)               | 640 (1.3%)               |
| South East                        | 56,699 (45.0%)           | 69,398 (55.0%)         | 52,011 (74.9%)              | 15,672 (22.6%)              | 578 (0.8%)               | 249 (0.4%)               | 318 (0.5%)               | 570 (0.8%)               |
| South West                        | 26,230 (54.0%)           | 22,388 (46.0%)         | 15,776 (70.5%)              | 5,861 (26.2%)               | 200 (0.9%)               | 117 (0.5%)               | 164 (0.7%)               | 270 (1.2%)               |
| West Midlands                     | 45,572 (48.1%)           | 49,188 (51.9%)         | 37,933 (77.1%)              | 9,350 (19.0%)               | 277 (0.6%)               | 189 (0.4%)               | 273 (0.6%)               | 1,166 (2.4%)             |
| Yorkshire and the Humber          | 45,909 (55.1%)           | 37,394 (44.9%)         | 28,991 (77.5%)              | 7,277 (19.5%)               | 235 (0.6%)               | 163 (0.4%)               | 198 (0.5%)               | 530 (1.4%)               |
| Other*                            | 23,519 (94.8%)           | 1,280 (5.2%)           | 80 (6.3%)                   | 868 (67.8%)                 | -                        | 21 (1.6%)                | 310 (24.2)               | -                        |
| Missing                           | 123,663 (88.5%)          | 16,043 (11.5%)         | 904 (5.6%)                  | 14,640 (91.3%)              | 24 (0.1%)                | 415 (2.6%)               | 14 (0.1%)                | 46 (0.3%)                |

# Suppressed due to low cell count; Region of origin = Unknown not shown due to low cell count; \*\*Region of England: Other = Crown Dependencies, Scotland, Wales, and Northern Ireland

**Supplementary Table 7.** Demographic characteristics of the total Million Migrant cohort, Million Migrant cohort without an NHS number, Million Migrant cohort with an NHS number but no NIMS link, and the Million Migrant-NIMS cohort as of 20 April 2022.

|                            | <b>Million Migrant cohort</b> | <b>Million Migrant cohort without an NHS number</b> | <b>Million Migrant cohort with an NHS number</b> | <b>Million Migrant cohort with NHS number but no NIMS link</b> | <b>Million Migrant-NIMS cohort<sup>1</sup></b> |
|----------------------------|-------------------------------|-----------------------------------------------------|--------------------------------------------------|----------------------------------------------------------------|------------------------------------------------|
|                            | N = 1,674,268 (100.0%)        | N = 628,482 (37.5%)                                 | N = 1,045,786 (62.5%)                            | N = 574,737 (55.0%)                                            | N = 465,470 (27.8%)                            |
| <b>Sex</b>                 |                               |                                                     |                                                  |                                                                |                                                |
| Female                     | 826,455 (49.4%)               | 268,555 (42.7%)                                     | 557,900 (53.3%)                                  | 294,159 (51.2%)                                                | 260,524 (56.0%)                                |
| Male                       | 847,813 (50.6%)               | 359,928 (57.3%)                                     | 487,886 (46.7%)                                  | 280,578 (48.8%)                                                | 204,946 (44.0%)                                |
| <b>Age*</b>                |                               |                                                     |                                                  |                                                                |                                                |
| 16-17                      | 20,262 (1.2%)                 | 6,070 (1.0%)                                        | 14,192 (1.4%)                                    | 7,326 (1.3%)                                                   | 3,688 (0.8%)                                   |
| 18-29                      | 668,838 (39.9%)               | 184,187 (29.3%)                                     | 484,651 (46.3%)                                  | 314,050 (54.6%)                                                | 159,899 (34.4%)                                |
| 30-39                      | 651,314 (38.9%)               | 267,831 (42.6%)                                     | 383,483 (36.7%)                                  | 182,391 (31.7%)                                                | 204,899 (44.0%)                                |
| 40-49                      | 228,433 (13.6%)               | 109,211 (17.4%)                                     | 119,222 (11.4%)                                  | 53,117 (9.2%)                                                  | 69,767 (15.0%)                                 |
| 50-54                      | 43,599 (2.6%)                 | 25,060 (4.0%)                                       | 18,539 (1.8%)                                    | 7,580 (1.3%)                                                   | 11,410 (2.5%)                                  |
| 55-59                      | 27,602 (1.6%)                 | 17,935 (2.9%)                                       | 9,667 (0.9%)                                     | 3,978 (0.7%)                                                   | 5,881 (1.3%)                                   |
| 60-64                      | 13,910 (0.8%)                 | 8,332 (1.3%)                                        | 5,578 (0.5%)                                     | 2,198 (0.4%)                                                   | 3,452 (0.7%)                                   |
| 65-69                      | 7,256 (0.4%)                  | 3,624 (0.6%)                                        | 3,632 (0.3%)                                     | 1,317 (0.2%)                                                   | 2,358 (0.5%)                                   |
| 70-79                      | 9,605 (0.6%)                  | 4,554 (0.7%)                                        | 5,051 (0.5%)                                     | 1,821 (0.3%)                                                   | 3,271 (0.7%)                                   |
| 80+                        | 3,449 (0.2%)                  | 1,678 (0.3%)                                        | 1,771 (0.2%)                                     | 959 (0.2%)                                                     | 845 (0.2%)                                     |
| <b>Region of origin</b>    |                               |                                                     |                                                  |                                                                |                                                |
| East Asia & Pacific        | 565,949 (33.8%)               | 189,124 (30.1%)                                     | 376,825 (36.0%)                                  | 279,917 (48.7%)                                                | 93,583 (20.1%)                                 |
| Europe & Central Asia      | 43,955 (2.6%)                 | 11,283 (1.8%)                                       | 32,672 (3.1%)                                    | 19,897 (3.5%)                                                  | 12,559 (2.7%)                                  |
| Latin America & Caribbean  | 889 (0.1%)                    | 320 (0.1%)                                          | 569 (0.1%)                                       | 338 (0.1%)                                                     | 227 (0.0%)                                     |
| Middle East & North Africa | 32,000 (1.9%)                 | 12,971 (2.1%)                                       | 19,029 (1.8%)                                    | 7,662 (1.3%)                                                   | 11,301 (2.4%)                                  |
| North America              | 307 (0.0%)                    | 52 (0.0%)                                           | 255 (0.0%)                                       | 95 (0.0%)                                                      | 159 (0.0%)                                     |
| South Asia                 | 741,298 (44.3%)               | 310,740 (49.4%)                                     | 430,558 (41.2%)                                  | 182,051 (31.7%)                                                | 247,141 (53.1%)                                |
| Sub-Saharan Africa         | 289,832 (17.3%)               | 103,970 (16.5%)                                     | 185,862 (17.8%)                                  | 84,773 (14.7%)                                                 | 100,488 (21.6%)                                |
| Missing                    | 38 (0.0%)                     | 22 (0.0%)                                           | 16 (0.0%)                                        | #                                                              | 12 (0.0%)                                      |
| <b>Entry Visa Type</b>     |                               |                                                     |                                                  |                                                                |                                                |
| Students                   | 812,186 (48.5%)               | 355,016 (56.5%)                                     | 457,170 (43.7%)                                  | 341,530 (59.4%)                                                | 112,626 (24.2%)                                |
| Work                       | 190,596 (11.4%)               | 64,788 (10.3%)                                      | 125,808 (12.0%)                                  | 58,430 (10.2%)                                                 | 67,198 (14.4%)                                 |
| Settlement & Dependents    | 397,169 (23.7%)               | 120,831 (19.2%)                                     | 276,338 (26.4%)                                  | 70,583 (12.3%)                                                 | 204,937 (44.0%)                                |
| Family Reunion             | 76,386 (4.6%)                 | 25,213 (4.0%)                                       | 51,173 (4.9%)                                    | 23,548 (4.1%)                                                  | 27,468 (5.9%)                                  |
| Refugee                    | 20,838 (1.2%)                 | 8,687 (1.4%)                                        | 12,151 (1.2%)                                    | 3,813 (0.7%)                                                   | 8,310 (1.8%)                                   |



|                                          | Million Migrant cohort<br>N = 1,674,268<br>(100.0%) | Million Migrant cohort without an NHS number<br>N = 628,482<br>(37.5%) | Million Migrant cohort with an NHS number<br>N = 1,045,786<br>(62.5%) | Million Migrant cohort with NHS number but no NIMS link<br>N = 574,737<br>(55.0%) | Million Migrant-NIMS cohort <sup>1</sup><br>N = 465,470<br>(27.8%) |
|------------------------------------------|-----------------------------------------------------|------------------------------------------------------------------------|-----------------------------------------------------------------------|-----------------------------------------------------------------------------------|--------------------------------------------------------------------|
| Other                                    | 161,780 (9.7%)                                      | 44,684 (7.1%)                                                          | 117,096 (11.2%)                                                       | 73,873 (12.9%)                                                                    | 41,881 (9.0%)                                                      |
| Missing                                  | 15,313 (0.9%)                                       | 9,263 (1.5%)                                                           | 6,050 (0.6%)                                                          | 2,960 (0.5%)                                                                      | 3,050 (0.7%)                                                       |
| <b>Length of time in UK*<br/>(years)</b> |                                                     |                                                                        |                                                                       |                                                                                   |                                                                    |
| <2                                       | 352,661 (21.1%)                                     | 81,865 (13.0%)                                                         | 270,796 (25.9%)                                                       | 123,070 (21.4%)                                                                   | 101,158 (21.7%)                                                    |
| 2 to 3                                   | 360,476 (21.5%)                                     | 82,267 (13.1%)                                                         | 278,209 (26.6%)                                                       | 171,178 (29.8%)                                                                   | 129,314 (27.8%)                                                    |
| 4 to 5                                   | 281,023 (16.8%)                                     | 79,844 (12.7%)                                                         | 201,179 (19.2%)                                                       | 133,864 (23.3%)                                                                   | 73,375 (15.8%)                                                     |
| 6 to 7                                   | 205,957 (12.3%)                                     | 129,858 (20.7%)                                                        | 76,099 (7.3%)                                                         | 40,181 (7.0%)                                                                     | 43,040 (9.2%)                                                      |
| >8                                       | 474,151 (28.3%)                                     | 254,648 (40.5%)                                                        | 219,503 (21.0%)                                                       | 106,444 (18.5%)                                                                   | 118,583 (25.5%)                                                    |
| <b>Region of England**</b>               |                                                     |                                                                        |                                                                       |                                                                                   |                                                                    |
| East Midlands                            | 56,475 (3.4%)                                       | -                                                                      | 56,475 (5.4%)                                                         | 30,900 (5.4%)                                                                     | 25,328 (5.4%)                                                      |
| East of England                          | 71,533 (4.3%)                                       | -                                                                      | 71,533 (6.8%)                                                         | 30,413 (5.3%)                                                                     | 40,564 (8.7%)                                                      |
| London                                   | 272,338 (16.3%)                                     | -                                                                      | 272,338 (26.0%)                                                       | 127,429 (22.2%)                                                                   | 143,529 (30.8%)                                                    |
| North East                               | 33,191 (2.0%)                                       | -                                                                      | 33,191 (3.2%)                                                         | 18,872 (3.3%)                                                                     | 14,146 (3.0%)                                                      |
| North West                               | 94,966 (5.7%)                                       | -                                                                      | 94,966 (9.1%)                                                         | 45,531 (7.9%)                                                                     | 48,795 (10.5%)                                                     |
| South East                               | 126,097 (7.5%)                                      | -                                                                      | 126,097 (12.1%)                                                       | 56,699 (9.9%)                                                                     | 68,828 (14.8%)                                                     |
| South West                               | 48,618 (2.9%)                                       | -                                                                      | 48,618 (4.6%)                                                         | 26,230 (4.6%)                                                                     | 22,118 (4.8%)                                                      |
| West Midlands                            | 94,760 (5.7%)                                       | -                                                                      | 94,760 (9.1%)                                                         | 45,572 (7.9%)                                                                     | 48,022 (10.3%)                                                     |
| Yorkshire & the Humber                   | 83,303 (5.0%)                                       | -                                                                      | 83,303 (8.0%)                                                         | 45,909 (8.0%)                                                                     | 36,864 (7.9%)                                                      |
| Other                                    | 24,799 (1.5%)                                       | -                                                                      | 24,799 (2.4%)                                                         | 23,519 (4.0%)                                                                     | 1279 (0.3%)                                                        |
| Missing                                  | 768,188 (45.9%)                                     | -                                                                      | 139,706 (13.4%)                                                       | 123,663 (21.5%)                                                                   | 15,997 (3.4%)                                                      |
| <b>Ethnicity***</b>                      |                                                     |                                                                        |                                                                       |                                                                                   |                                                                    |
| Black                                    | -                                                   | -                                                                      | -                                                                     | -                                                                                 | 56,664 (12.2%)                                                     |
| Mixed                                    | -                                                   | -                                                                      | -                                                                     | -                                                                                 | 14,338 (3.1%)                                                      |
| Other                                    | -                                                   | -                                                                      | -                                                                     | -                                                                                 | 114,950 (24.7%)                                                    |
| South Asian                              | -                                                   | -                                                                      | -                                                                     | -                                                                                 | 179,460 (38.6%)                                                    |
| Unknown                                  | -                                                   | -                                                                      | -                                                                     | -                                                                                 | 74,597 (16.0%)                                                     |
| White                                    | -                                                   | -                                                                      | -                                                                     | -                                                                                 | 25,461 (5.5%)                                                      |
| <b>COVID-19 dose</b>                     |                                                     |                                                                        |                                                                       |                                                                                   |                                                                    |
| First                                    | -                                                   | -                                                                      | -                                                                     | -                                                                                 | 465,470 (100.0%)                                                   |
| Second                                   | -                                                   | -                                                                      | -                                                                     | -                                                                                 | 427,073 (91.8%)                                                    |
| Third/Booster                            | -                                                   | -                                                                      | -                                                                     | -                                                                                 | 238,721 (51.3%)                                                    |

# Suppressed due to low cell count; <sup>1</sup> Million Migrant-NIMS cohort includes those with match rang 1-5. Excluded matched rank 8 (N = 5,579)

**Appendix H. Results - Delayed vaccination**

**Supplementary Table 8.** Sample size for delayed second and third COVID-19 dose vaccinations by ethnicity and visa type (as seen in Figure 1 in the main text).

|                   | <b>Second dose delayed<br/>Sample Size (N)</b> | <b>Third dose delayed<br/>Sample Size (N)</b> |
|-------------------|------------------------------------------------|-----------------------------------------------|
| <b>Ethnicity</b>  |                                                |                                               |
| Black             | 50670                                          | 22634                                         |
| Mixed             | 13149                                          | 7818                                          |
| Other             | 102953                                         | 65895                                         |
| South Asian       | 167931                                         | 85575                                         |
| Unknown           | 63030                                          | 32011                                         |
| White             | 23652                                          | 15509                                         |
| <b>Visa type*</b> |                                                |                                               |
| Family            | 24604                                          | 13369                                         |
| Other             | 34924                                          | 17688                                         |
| Refugee           | 7217                                           | 3176                                          |
| Settlement        | 190774                                         | 100288                                        |
| Students          | 99137                                          | 48053                                         |
| Work              | 64729                                          | 46868                                         |

\* Unknown visa type removed due to low numbers.

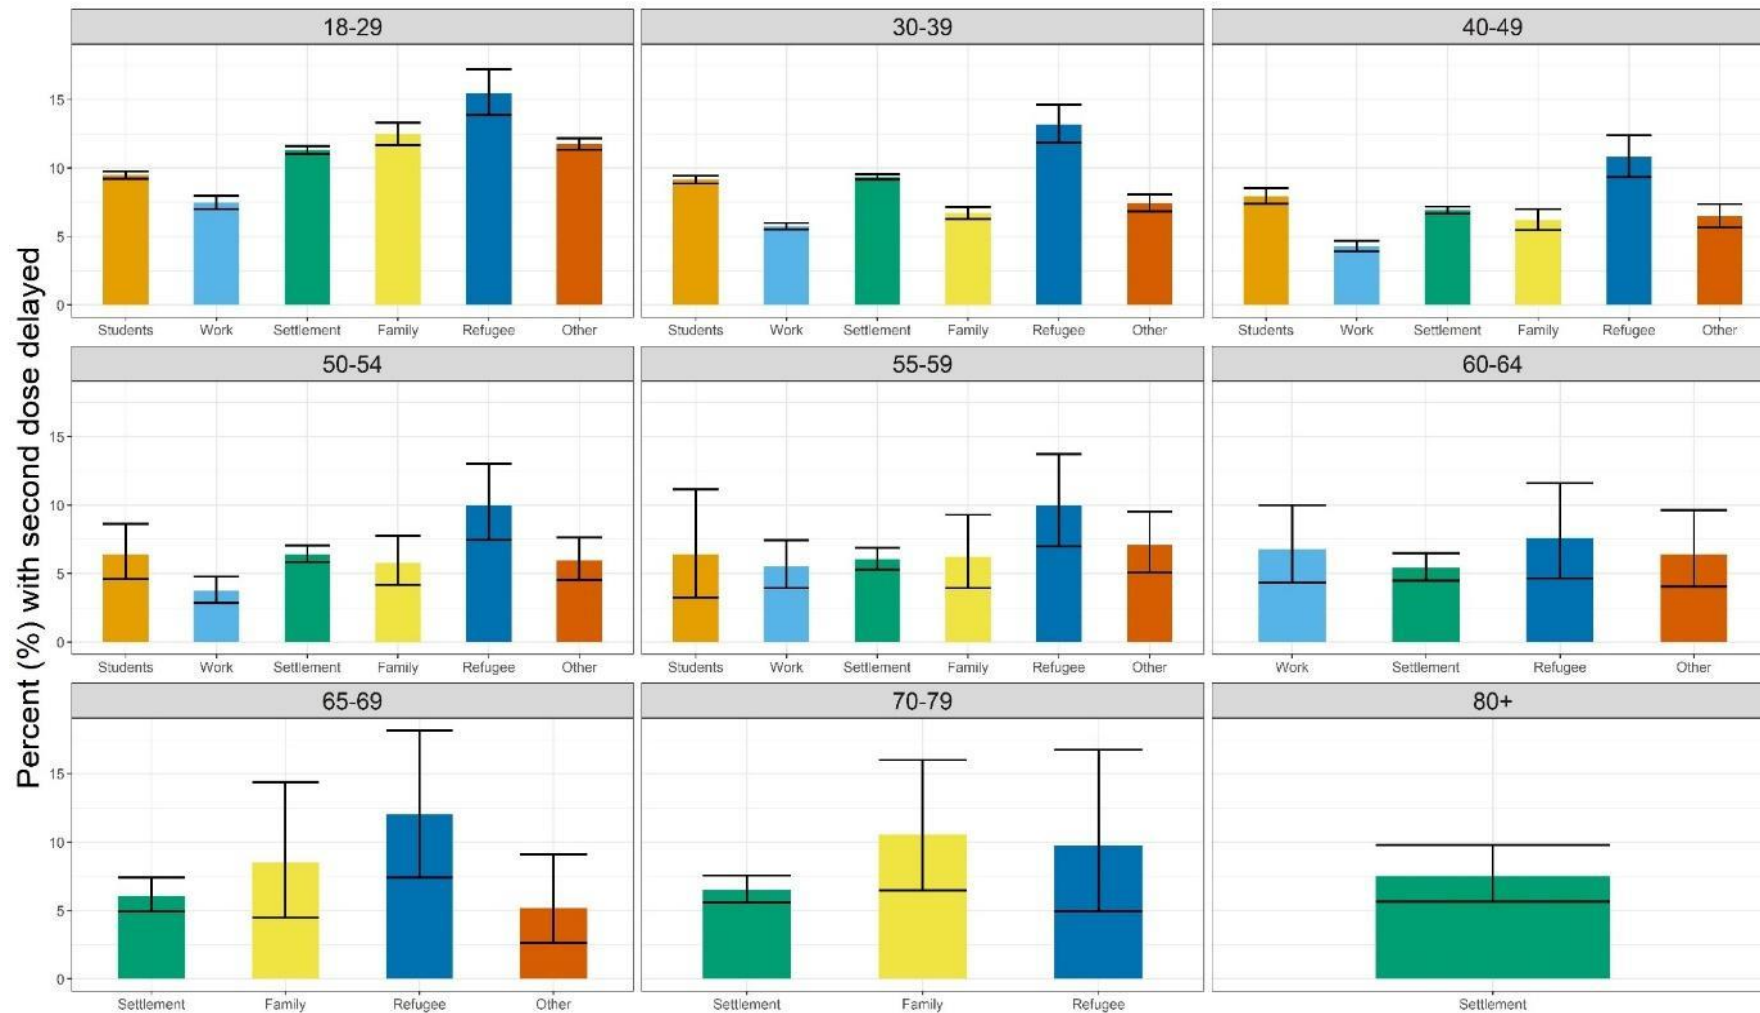

**Supplementary Figure 3. Second dose delayed by visa type and age.**

Proportion (%) and error bars represent 95% Confidence Intervals of second dose delayed by age group comparing visa type as of 20 April 2022.

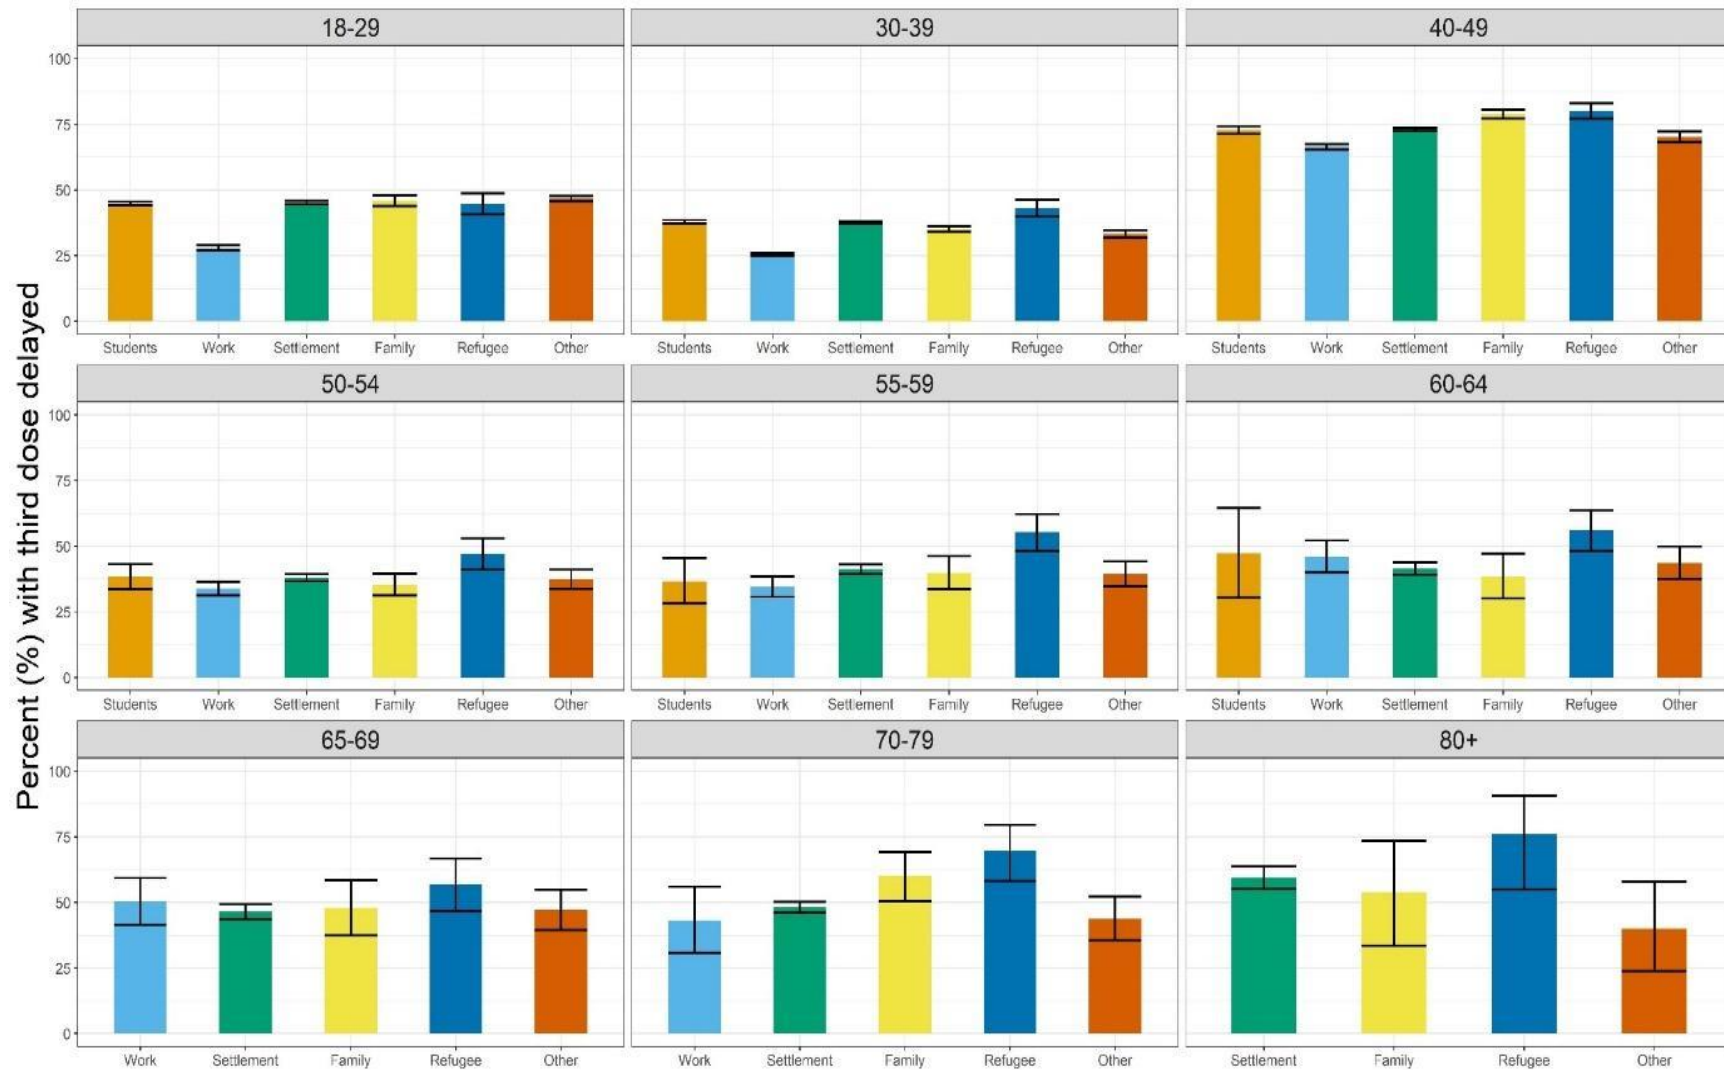

**Supplementary Figure 4. Third dose delayed by visa type and age.**

Proportion (%) and error bars represent 95% Confidence Intervals of third dose delayed by age group comparing visa type as of 20 April 2022.

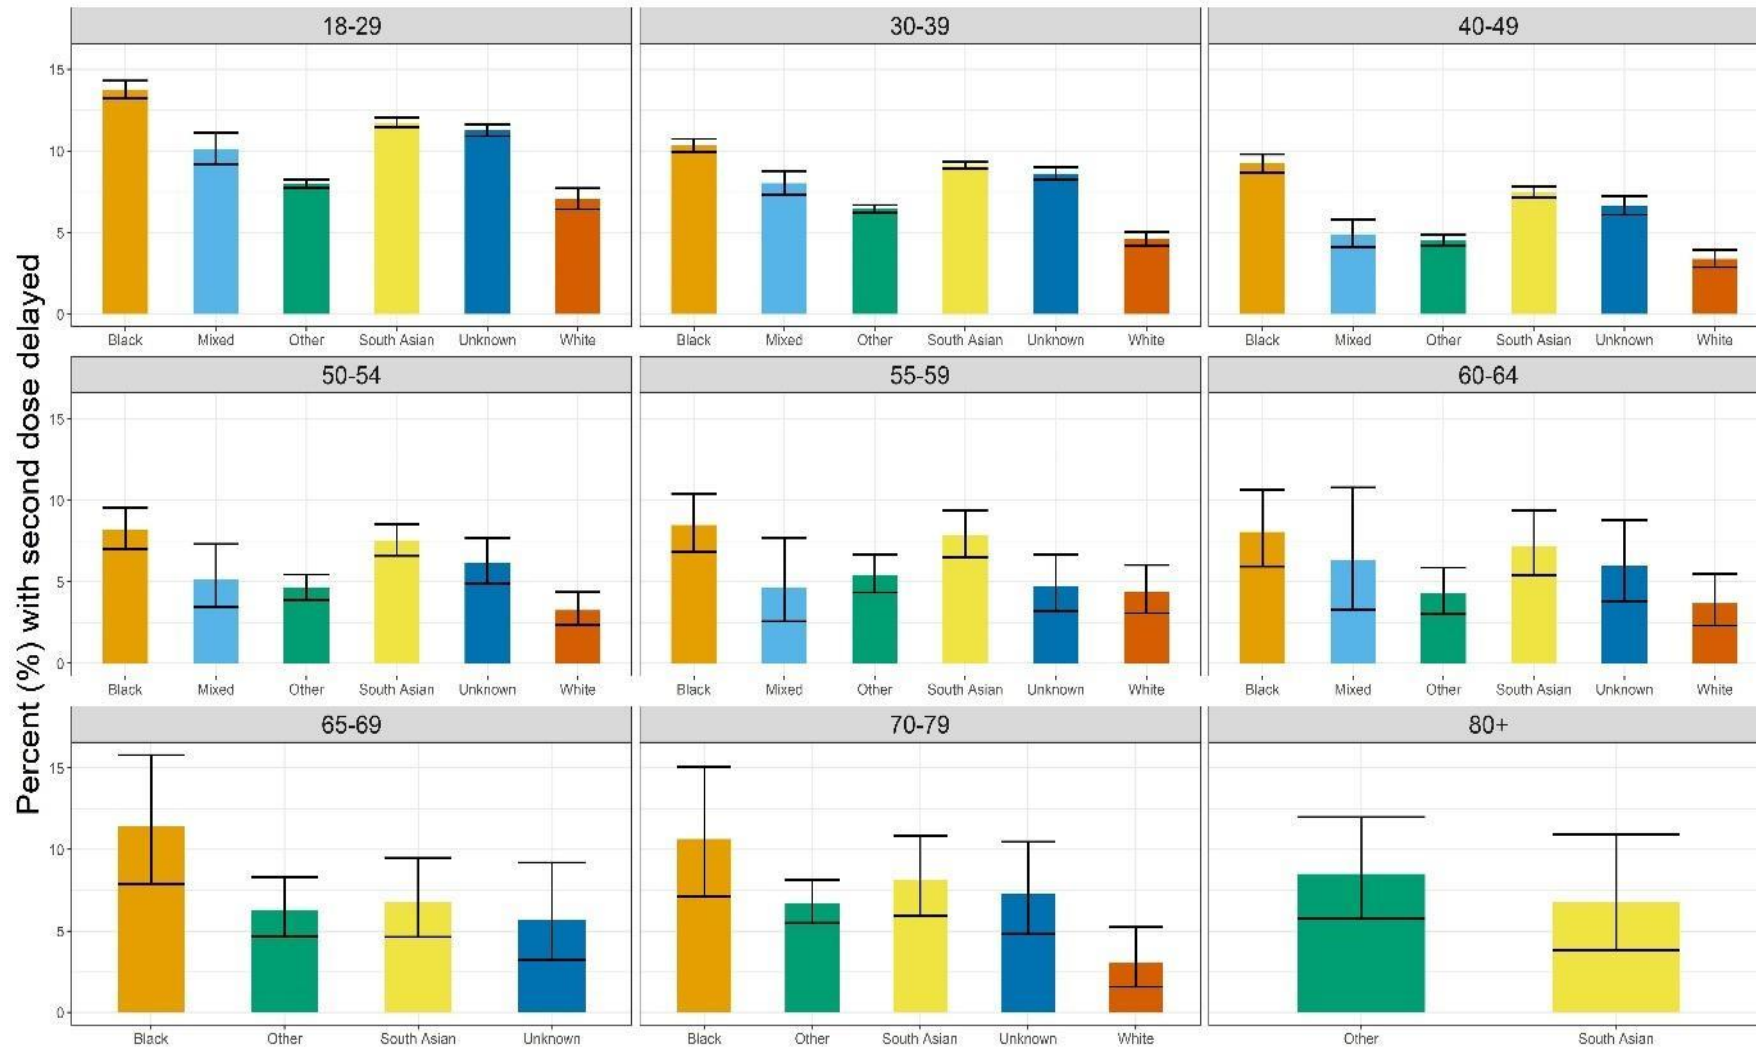

**Supplementary Figure 5. Second dose delayed by ethnicity and age.**

Proportion (%) and error bars represent 95% Confidence Intervals of second dose delayed by age group comparing ethnicity as of 20 April 2022.

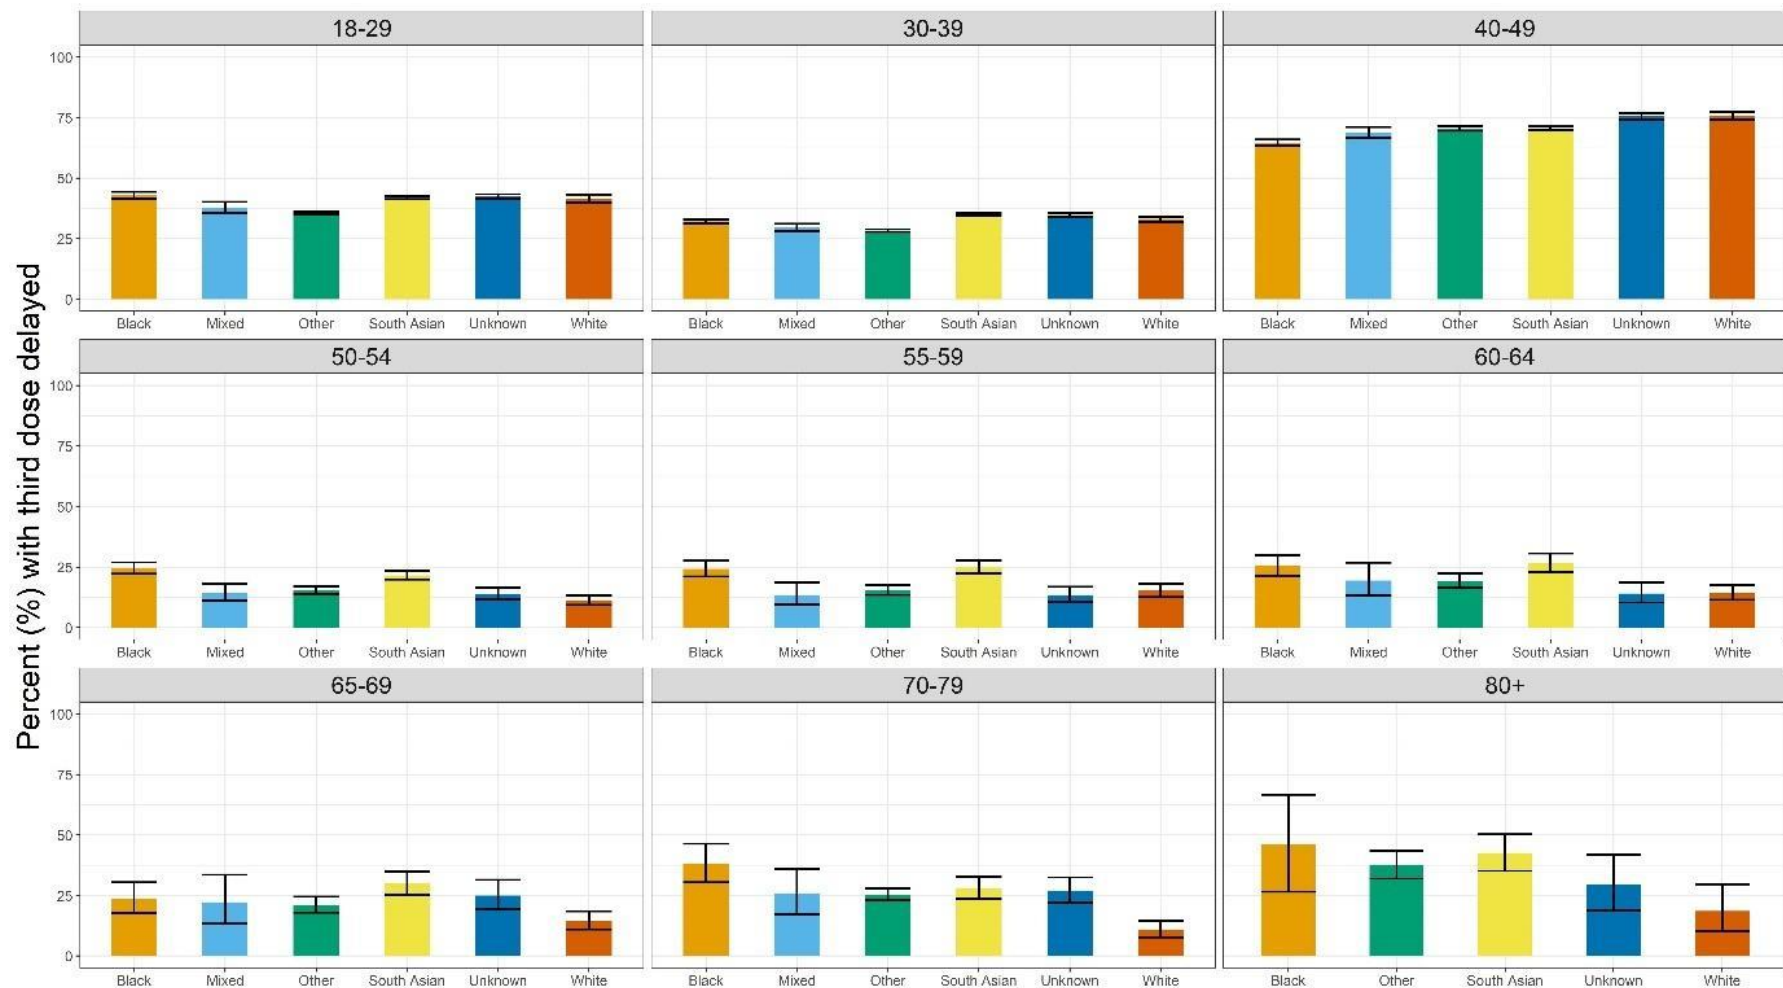

**Supplementary Figure 6. Third dose delayed by ethnicity and age.**

Proportion (%) and error bars represent 95% Confidence Intervals of third dose delayed by age group comparing ethnicity as of 20 April 2022

**Appendix I. Results - Overdue vaccination**

**Supplementary Table 9.** Sample size for overdue second and third COVID-19 dose vaccinations for migrants and the general population in England (as seen in Figure 2 in the main text).

| <b>Population</b>      | <b>Age group</b> | <b>Second overdue<br/>Sample size (N)</b> | <b>Third overdue<br/>Sample Size (N)</b> |
|------------------------|------------------|-------------------------------------------|------------------------------------------|
| <b>Million Migrant</b> | 18-29            | 148795                                    | 159899                                   |
|                        | 30-39            | 177465                                    | 204899                                   |
|                        | 40-49            | 64301                                     | 69767                                    |
|                        | 50-54            | 10766                                     | 11410                                    |
|                        | 55-59            | 5620                                      | 5881                                     |
|                        | 60-64            | 3327                                      | 3452                                     |
|                        | 65-69            | 2310                                      | 2358                                     |
|                        | 70-79            | 3231                                      | 3271                                     |
|                        | 80+              | 841                                       | 845                                      |
| <b>England</b>         | 18-29            | 2469782                                   | 2186149                                  |
|                        | 30-39            | 2446045                                   | 2269631                                  |
|                        | 40-49            | 2435545                                   | 2340569                                  |
|                        | 50-54            | 1401463                                   | 1367744                                  |
|                        | 55-59            | 1396906                                   | 1369893                                  |
|                        | 60-64            | 1210860                                   | 1191316                                  |
|                        | 65-69            | 1024604                                   | 1011108                                  |
|                        | 70-79            | 2009630                                   | 1992081                                  |
|                        | 80+              | 1021538                                   | 1012928                                  |



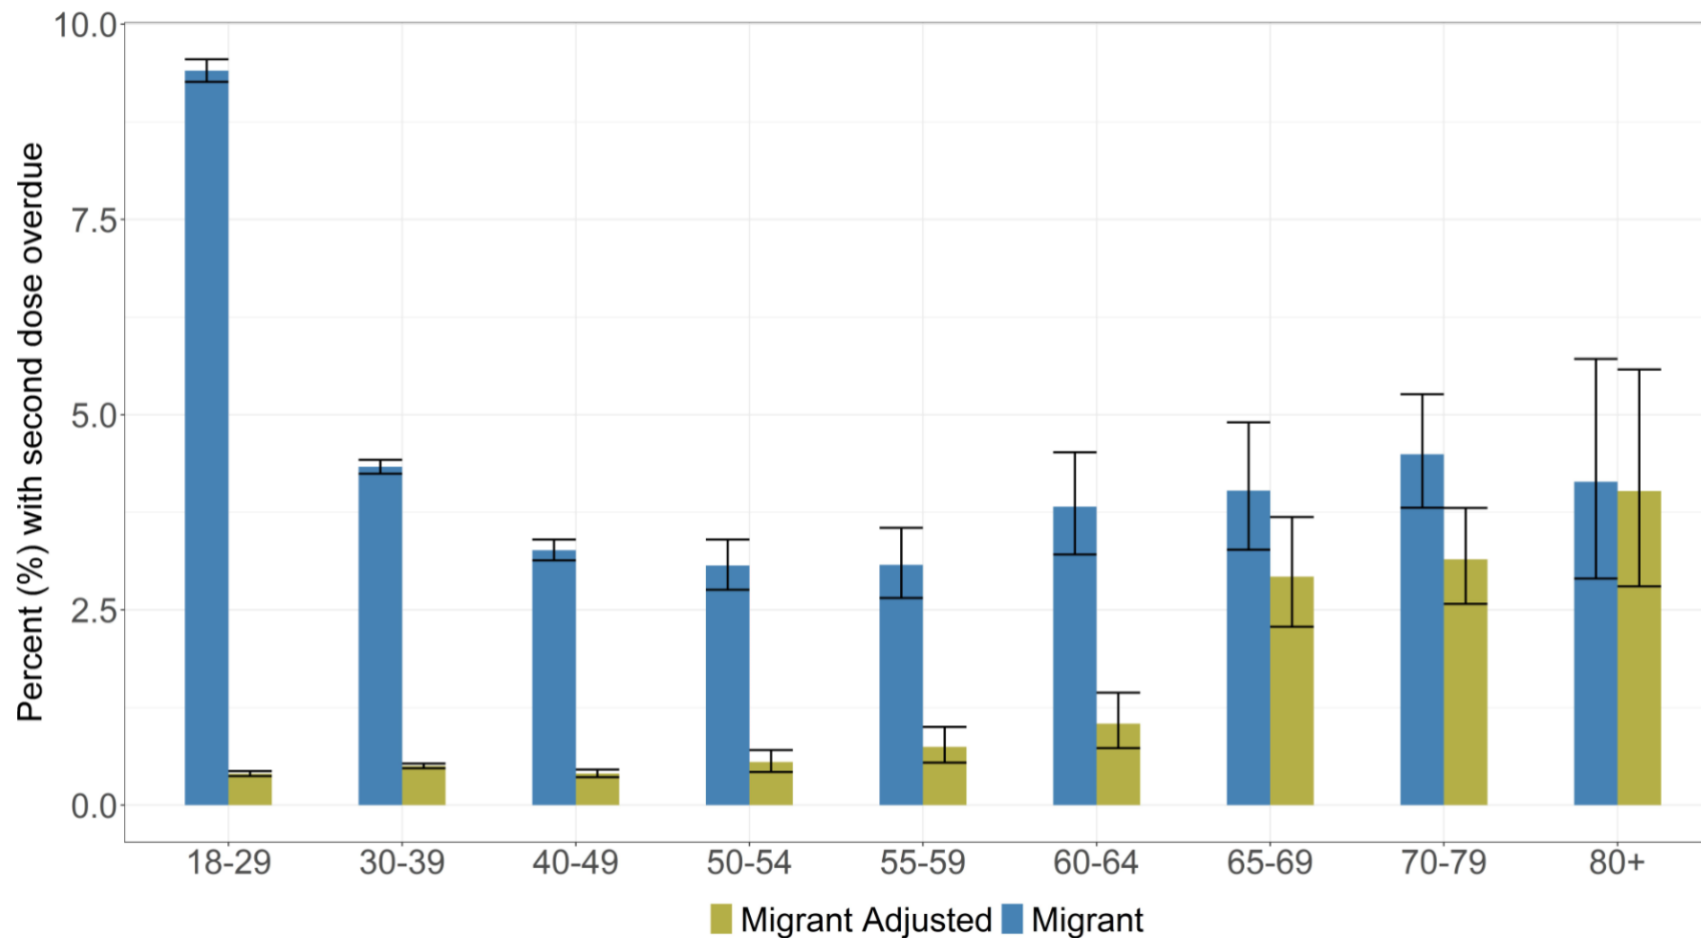

**Supplementary Figure 7. Sensitivity analysis 1 - Second dose overdue for Migrant and Migrant Adjusted.**

Proportion (%) and error bars represent 95% Confidence Intervals with second dose overdue comparing a shortened study end date of 01 June 2021 (Migrant Adjusted) and the original study end date of 20 April 2022 (Migrant).

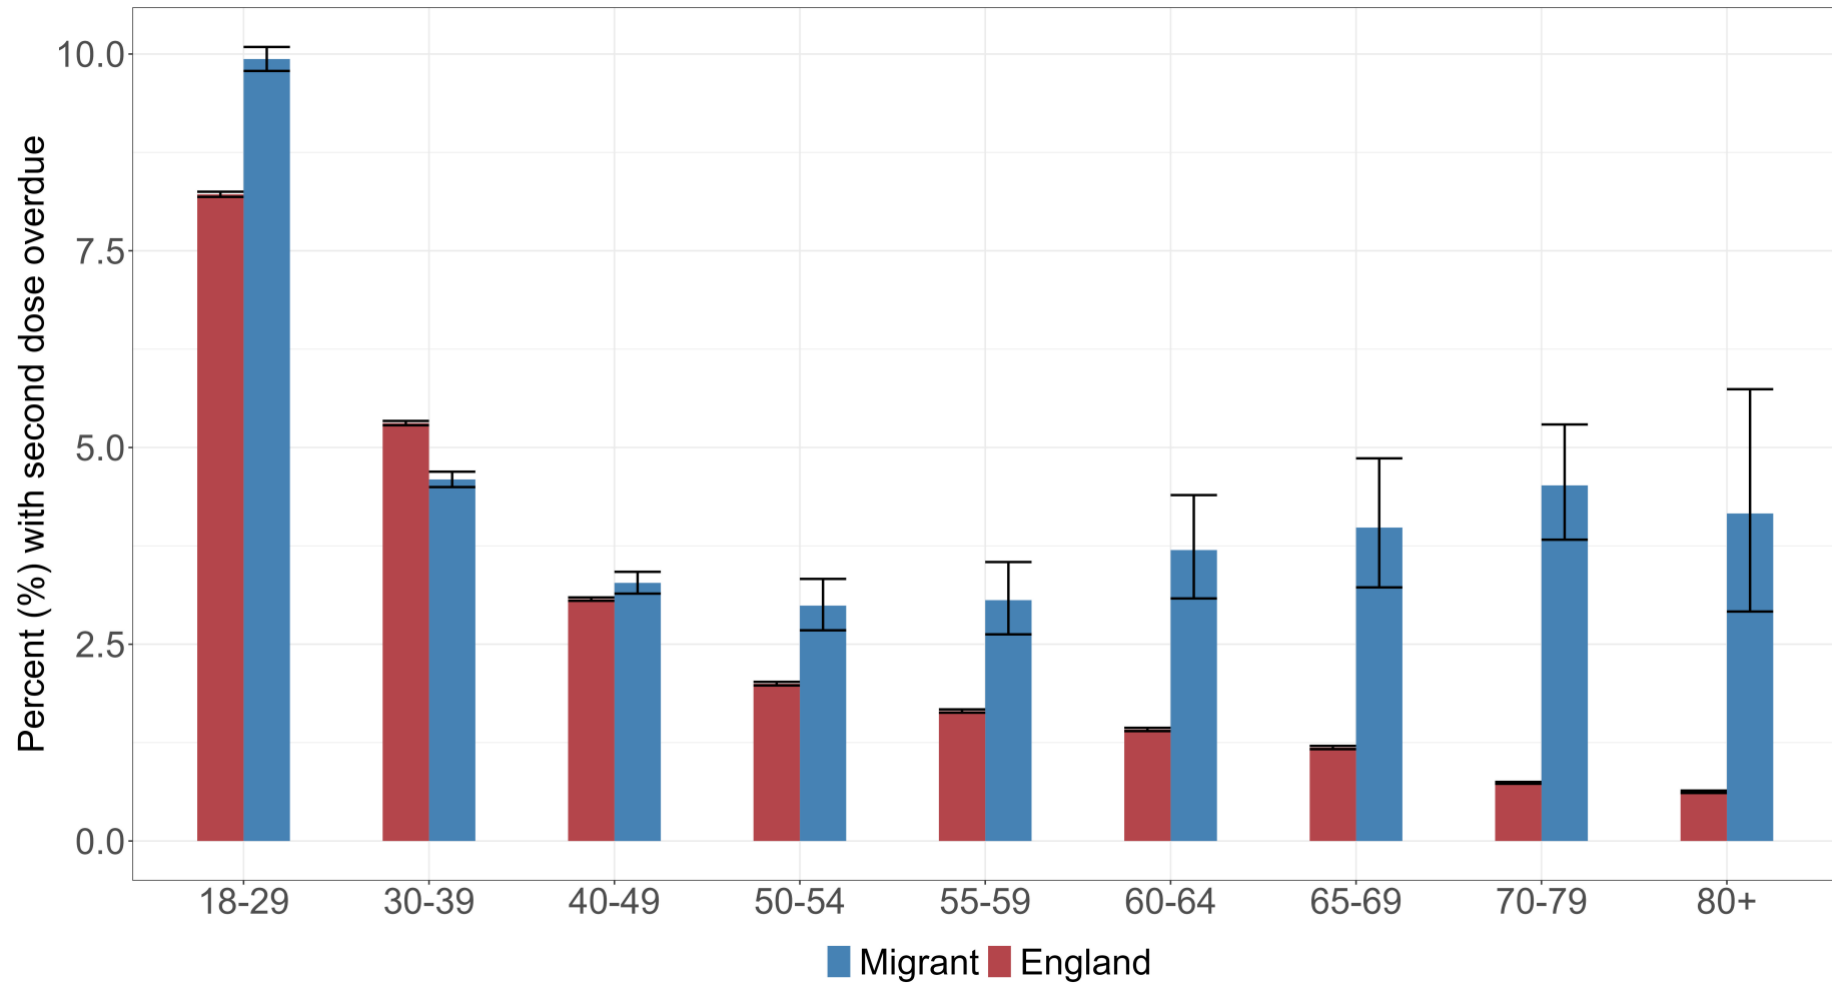

**Supplementary Figure 8. Sensitivity analysis 1 – Second dose overdue for more recent migrants and England.**

Proportion (%) and error bars represent 95% Confidence Intervals with second dose overdue with individuals arriving on student, work, and working holiday visas in the last five years (after 2017) within the Million Migrant-NIMS cohort (blue) to the England cohort (red) as of 20 April 2022.

**Supplementary Table 10.** Sample size for overdue second COVID-19 dose vaccinations by visa type and age (as seen in Figure 3 in the main text).

| Age group  | Visa type  | Second overdue Sample size (N) |      |
|------------|------------|--------------------------------|------|
| 18-29      | Family     | 7636                           |      |
|            | Other      | 28179                          |      |
|            | Refugee    | 2338                           |      |
|            | Settlement | 48919                          |      |
|            | Students   | 59455                          |      |
|            | Work       | 12378                          |      |
|            | England    | 2469782                        |      |
| 30-39      | Family     | 13604                          |      |
|            | Other      | 7409                           |      |
|            | Refugee    | 2615                           |      |
|            | Settlement | 97684                          |      |
|            | Students   | 42397                          |      |
|            | Work       | 40060                          |      |
|            | England    | 2446045                        |      |
| 40-49      | Family     | 4237                           |      |
|            | Other      | 3505                           |      |
|            | Refugee    | 1730                           |      |
|            | Settlement | 38919                          |      |
|            | Students   | 9126                           |      |
|            | Work       | 11714                          |      |
|            | England    | 2435545                        |      |
| 50-54      | Family     | 748                            |      |
|            | Other      | 999                            |      |
|            | Refugee    | 493                            |      |
|            | Settlement | 6715                           |      |
|            | Students   | 649                            |      |
|            | Work       | 1679                           |      |
|            | England    | 1401463                        |      |
| 55-59      | Family     | 368                            |      |
|            | Other      | 580                            |      |
|            | Refugee    | 345                            |      |
|            | Settlement | 3606                           |      |
|            | Work       | 732                            |      |
|            | England    | 1396906                        |      |
|            | 60-64      | Family                         | 188  |
| Other      |            | 348                            |      |
| Settlement |            | 2181                           |      |
| Work       |            | 363                            |      |
| England    |            | 1210860                        |      |
| 65-69      |            | Other                          | 223  |
|            |            | Settlement                     | 1591 |
|            | England    | 1024604                        |      |

| <b>Age group</b> | <b>Visa type</b> | <b>Second overdue<br/>Sample size (N)</b> |
|------------------|------------------|-------------------------------------------|
| 70-79            | Family           | 193                                       |
|                  | Other            | 180                                       |
|                  | Settlement       | 2658                                      |
|                  | England          | 2009630                                   |
| 80+              | Settlement       | 714                                       |
|                  | England          | 1021538                                   |

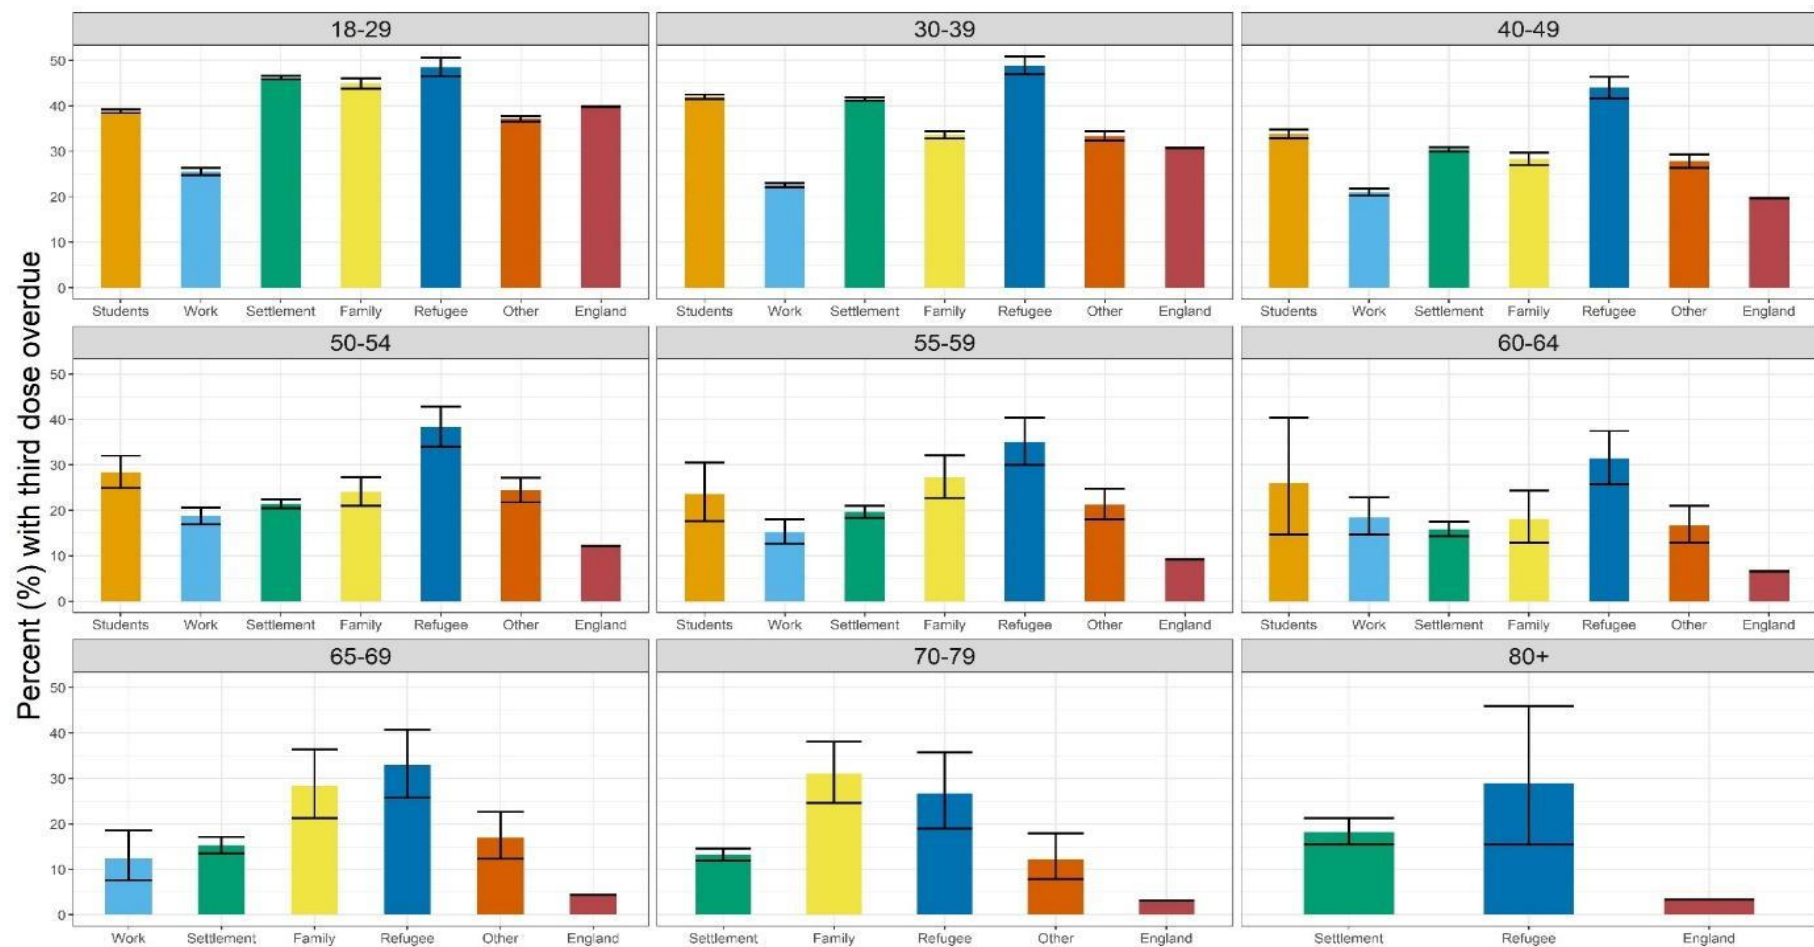

**Supplementary Figure 9. Third dose overdue by visa type and age.**

Proportion (%) and error bars represent 95% Confidence Intervals with third dose overdue by age group comparing visa type and England cohort as of 20 April 2022.

**Supplementary Table 11.** Sample size for overdue second COVID-19 dose vaccinations by ethnicity and age (as seen in Figure 4 in the main text).

| <b>Ethnicity</b> | <b>Age</b> | <b>England<br/>Sample size (N)</b> | <b>Migrant<br/>Sample Size (N)</b> |
|------------------|------------|------------------------------------|------------------------------------|
| Black            | 18-29      | 52556                              | 17482                              |
|                  | 30-39      | 57071                              | 23559                              |
|                  | 40-49      | 63616                              | 10940                              |
|                  | 50-54      | 27874                              | 1980                               |
|                  | 55-59      | 24101                              | 1015                               |
|                  | 60-64      | 15365                              | 581                                |
|                  | 65-69      | 8904                               | 280                                |
|                  | 70-79      | 11578                              | -                                  |
|                  | 80+        | 8463                               | -                                  |
| Mixed            | 18-29      | 46557                              | 4324                               |
|                  | 30-39      | 38983                              | 5876                               |
|                  | 40-49      | 31059                              | 2709                               |
|                  | 50-54      | 12404                              | -                                  |
|                  | 55-59      | 10402                              | -                                  |
|                  | 60-64      | 6923                               | -                                  |
|                  | 65-69      | 4333                               | -                                  |
|                  | 70-79      | 5733                               | -                                  |
|                  | 80+        | 2730                               | -                                  |
| Other            | 18-29      | 74144                              | 48596                              |
|                  | 30-39      | 72765                              | 41956                              |
|                  | 40-49      | 65016                              | 15209                              |
|                  | 50-54      | 23688                              | 3021                               |
|                  | 55-59      | 18606                              | 1577                               |
|                  | 60-64      | 14000                              | 886                                |
|                  | 65-69      | 10360                              | 772                                |
|                  | 70-79      | 13685                              | 1527                               |
|                  | 80+        | 5656                               | 355                                |
| South Asian      | 18-29      | 214641                             | 45838                              |
|                  | 30-39      | 245721                             | 98039                              |
|                  | 40-49      | 220269                             | 28366                              |
|                  | 50-54      | 78183                              | 3196                               |
|                  | 55-59      | 55510                              | 1467                               |
|                  | 60-64      | 48846                              | 749                                |
|                  | 65-69      | 41202                              | 485                                |
|                  | 70-79      | 51744                              | 547                                |
|                  | 80+        | 24857                              | -                                  |
| Unknown          | 18-29      | 335356                             | 36859                              |
|                  | 30-39      | 188839                             | 25497                              |
|                  | 40-49      | 186375                             | 7894                               |
|                  | 50-54      | 114527                             | 1308                               |
|                  | 55-59      | 106820                             | 700                                |
|                  | 60-64      | 88102                              | 419                                |

| <b>Ethnicity</b> | <b>Age</b> | <b>England<br/>Sample size (N)</b> | <b>Migrant<br/>Sample Size (N)</b> |
|------------------|------------|------------------------------------|------------------------------------|
| White            | 65-69      | 63525                              | 291                                |
|                  | 70-79      | 93107                              | 389                                |
|                  | 80+        | 36582                              | -                                  |
|                  | 18-29      | 1746325                            | 6800                               |
|                  | 30-39      | 1842589                            | 9972                               |
|                  | 40-49      | 1869168                            | 4649                               |
|                  | 50-54      | 1144773                            | 1342                               |
|                  | 55-59      | 1181453                            | 816                                |
|                  | 60-64      | 1037617                            | 623                                |
|                  | 65-69      | 896280                             | -                                  |
|                  | 70-79      | 1833776                            | 413                                |
|                  | 80+        | 943250                             | -                                  |

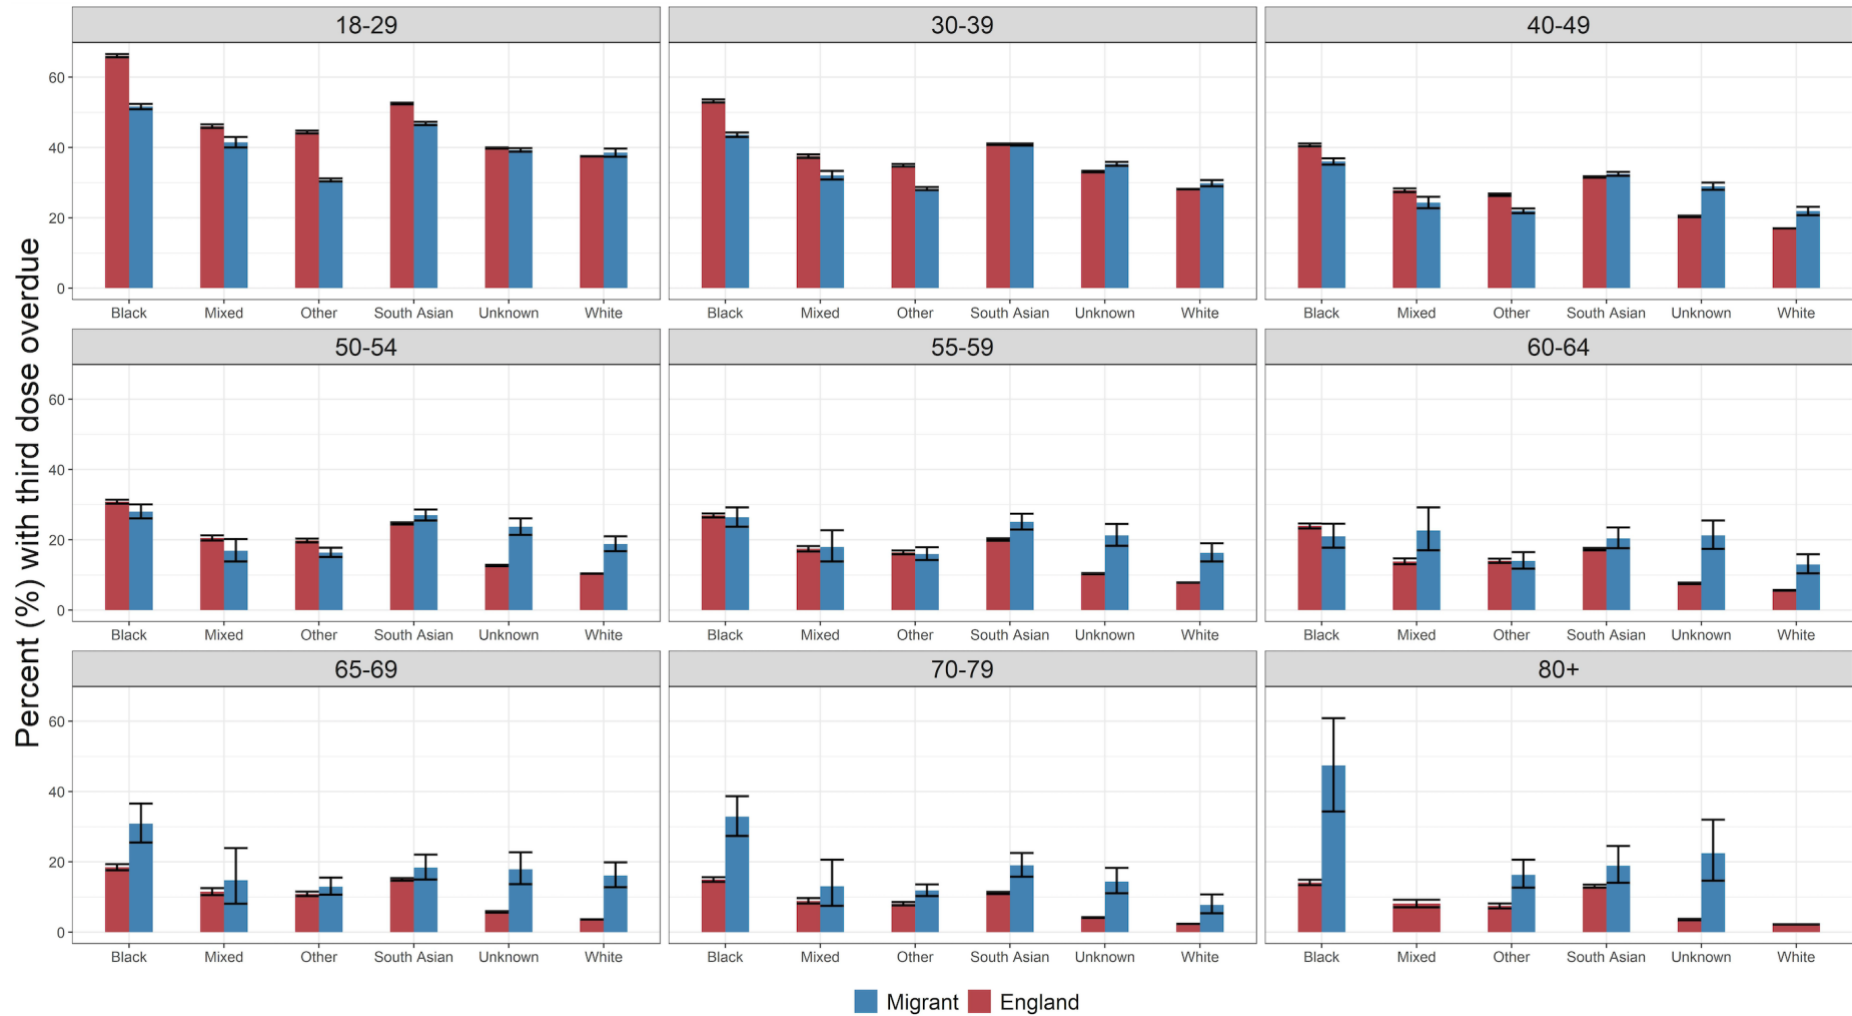

**Supplementary Figure 10. Third dose overdue by ethnicity and age.**

Proportion (%) and error bars represent 95% Confidence Intervals with third dose overdue by age group comparing ethnicity and England cohort as of 20 April 2022.



## References

- 1 The rollout of the COVID-19 vaccination programme in England. National Audit Office, 2022 <https://www.nao.org.uk/wp-content/uploads/2022/02/The-rollout-of-the-COVID-19-vaccination-programme-in-England.pdf>.
- 2 Regulations making COVID-19 vaccination a condition of deployment to end. UK Gov. <https://www.gov.uk/government/news/regulations-making-covid-19-vaccination-a-condition-of-deployment-to-end>.
- 3 Tuberculosis tests for visa applicants. <https://www.gov.uk/tb-test-visa#:~:text=You%27ll%20need%20to%20have,coughed%20up%20from%20your%20lungs>.
- 4 Crawshaw AF, Pareek M, Were J, *et al.* Infectious disease testing of UK-bound refugees: a population-based, cross-sectional study. *BMC Med* 2018; **16**: 1–12.
- 5 Health Protocol: Pre-entry health assessment for UK bound refugees. Home Office, Public Health England, International Organization for Migration. 2020 June. Available from: Home Off. Public Health Engl. Int. Organ. Migr. 2020; published online June. [https://assets.publishing.service.gov.uk/government/uploads/system/uploads/attachment\\_data/file/892799/Badged\\_HA\\_protocol\\_IOM\\_HO\\_PHE\\_-\\_June\\_2020.odt.pdf](https://assets.publishing.service.gov.uk/government/uploads/system/uploads/attachment_data/file/892799/Badged_HA_protocol_IOM_HO_PHE_-_June_2020.odt.pdf).
- 6 The OpenSAFELY Collaborative. OpenSAFELY Vaccine Coverage Reports. 2022 [reports.opensafely.org/reports/vaccine-coverage-index](https://reports.opensafely.org/reports/vaccine-coverage-index).
- 7 Atherton F, McBride M, Smith G, Whitty C, Van-Tam J. Correspondence: Letter to the profession from the UK Chief Medical Officers regarding the UK COVID-19 vaccination programmes. 2020. <https://www.gov.uk/government/publications/letter-to-the-profession-from-the-uk-chief-medical-officers-on-the-uk-covid-19-vaccination-programmes/letter-to-the-profession-from-the-uk-chief-medical-officers-regarding-the-uk-covid-19-vaccination-programmes>.
- 8 NHS England News. NHS booster bookings open to every eligible adult. 2021. <https://www.england.nhs.uk/2021/12/nhs-booster-bookings-open-to-every-eligible-adult/>.
- 9 NHS England News. NHS begins COVID-19 booster vaccination campaign. 2021. <https://www.england.nhs.uk/2021/09/nhs-begins-covid-19-booster-vaccination-campaign/>.
- 10 NHS England News. Top up jab bookings to open up for more than one million people. 2021. <https://www.england.nhs.uk/2021/11/top-up-jab-bookings-to-open-up-for-more-than-one-million-people/>.
- 11 JCVI advice on COVID-19 booster vaccines for those aged 18 to 39 and a second dose for ages 12 to 15. UK Health Security Agency, 2021 <https://www.gov.uk/government/news/jcvi-advice-on-covid-19-booster-vaccines-for-those-aged-18-to-39-and-a-second-dose-for-ages-12-to-15>.
